# Supplementary material for: Molecular and Morphological Characterization of Exserohilum turcicum (Passerini) Leonard and Suggs Causing Northern Corn Leaf Blight of Maize in Bihar
Source: MDPI journal article supplement (doi:10.3390/bioengineering9080403), 2022-08-19
Supplement: s1 [file s1]

Reference sequence (1): BhEt\_3  
Identities normalised by aligned length.  
Colored by: identity

1/10



|                |        |        |                                                                                  |                                                                                   |   |   |   |   |   |   |   |   |     |
|----------------|--------|--------|----------------------------------------------------------------------------------|-----------------------------------------------------------------------------------|---|---|---|---|---|---|---|---|-----|
| consensus/90%  |        |        | TSGAUGACATssTsAGSCCsCGUGG.....AGGwAsuGSuCAuAGUGCuGTCTGsAsuTTGTTUGGUATC           |                                                                                   |   |   |   |   |   |   |   |   |     |
| consensus/80%  |        |        | TUGAUGACATssTuAGSCCsCGUGG.....AGGAAsuGSuGCAGAGUGCGGTCTGGAAsuTTGTTUGGUATC         |                                                                                   |   |   |   |   |   |   |   |   |     |
| consensus/70%  |        |        | TUGAGGACATCTTUAAGCCSCGuGG.....AGGAAsGSuGCAGAGUGCGGTCTGGAAsGTTGTTGGGGATC          |                                                                                   |   |   |   |   |   |   |   |   |     |
|                | cov    | pid    | 241                                                                              | :                                                                                 | . | . | . | . | . | 3 | . | . | 320 |
| 1              | BhEt_3 | 100.0% | 100.0%                                                                           | ATCTCCAAGATCCGCGAGGAGTTCCCGACCGCATGATGGCCACCT-----                                |   |   |   |   |   |   |   |   |     |
| 2              | BeEt_2 | 60.7%  | 19.0%                                                                            | CATTCAACGAAGTAAGAAGAGTTCTTGTTCTGGACGTTGCGCATCTGATCCTCGACCTCCTTCATAGCGACACGGCCACG  |   |   |   |   |   |   |   |   |     |
| 3              | BeEt_1 | 60.7%  | 19.7%                                                                            | CATTCAACGAAGTAAGAAGAGTTCTTGTTCTGGACGTTGCGCATCTGATCCTCGACCTCCTTCATAGCGACACGGCCACG  |   |   |   |   |   |   |   |   |     |
| 4              | KhEt_1 | 82.5%  | 23.5%                                                                            | CCCTCACGAATTAGAAGAATTTCTGGTTCTGGACTTTGCGCACCTGGCCCTCACCTCCTTCATGGGAGACCTTACCACG   |   |   |   |   |   |   |   |   |     |
| 5              | BeEt_9 | 94.5%  | 24.6%                                                                            | CACCTCAACGAAGTAAGAGGAGTTCTTGTTCTGGACGTTGCGCATCTGGTCCTCGACCTCCTTCATGGCGACCTTACCACG |   |   |   |   |   |   |   |   |     |
| 6              | SaEt_7 | 95.0%  | 23.9%                                                                            | CACCTCAACGAAGTAAGAGGAGTTCTTGTTCTGGACGTTGCGCATCTGGTCCTCGACCTCCTTCATGGCGACCTTACCACG |   |   |   |   |   |   |   |   |     |
| 7              | SaEt_6 | 92.6%  | 24.3%                                                                            | CACCTCAACGAAGTAAGAGGAGTTCTTGTTCTGGACGTTGCGCATCTGGTCCTCGACCTCCTTCATGGCGACCTTACCACG |   |   |   |   |   |   |   |   |     |
| 8              | SaEt_9 | 93.9%  | 23.7%                                                                            | CACCTCAACGAAGTAAGAGGAGTTCTTGTTCTGGACGTTGCGCATCTGGTCCTCGACCTCCTTCATGGCGACCTTACCACG |   |   |   |   |   |   |   |   |     |
| 9              | BeEt_8 | 93.2%  | 22.9%                                                                            | CACCTCAACGAAGTAAGAGGAGTTCTTGTTCTGGACGTTGCGCATCTGGTCCTCGACCTCCTTCATGGCGACCTTACCACG |   |   |   |   |   |   |   |   |     |
| 10             | BeEt_6 | 82.5%  | 22.4%                                                                            | CACCTCAACGAAGTAAGAGGAGTTCTTGTTCTGGACGTTGCGCATCTGGTCCTCGACCTCCTTCATGGCGACCTTACCACG |   |   |   |   |   |   |   |   |     |
| 11             | BeEt_5 | 92.9%  | 24.2%                                                                            | CACCTCAACGAAGTAAGAGGAGTTCTTGTTCTGGACGTTGCGCATCTGGTCCTCGACCTCCTTCATGGCGACCTTACCACG |   |   |   |   |   |   |   |   |     |
| 12             | BhEt_7 | 82.5%  | 24.1%                                                                            | CACCTCAACGAAGTAGGAAGAGTTCTTGTTCTGGACGTTGCGCATCTGGTCCTCGACCTCCTTCATGGAGACCTTACCACG |   |   |   |   |   |   |   |   |     |
| 13             | BhEt_6 | 84.6%  | 23.2%                                                                            | CACCTCAACGAAGTAGGAAGAGTTCTTGTTCTGGACGTTGCGCATCTGGTCCTCGACCTCCTTCATGGAGACCTTACCACG |   |   |   |   |   |   |   |   |     |
| 14             | BhEt_5 | 88.4%  | 24.2%                                                                            | CACCTCAACGAAGTAGGAAGAGTTCTTGTTCTGGACGTTGCGCATCTGGTCCTCGACCTCCTTCATGGAGACCTTACCACG |   |   |   |   |   |   |   |   |     |
| 15             | BhEt_4 | 90.9%  | 24.9%                                                                            | CACCTCAACGAAGTAGGAAGAGTTCTTGTTCTGGACGTTGCGCATCTGGTCCTCGACCTCCTTCATGGAGACCTTACCACG |   |   |   |   |   |   |   |   |     |
| 16             | KhEt_2 | 80.3%  | 24.2%                                                                            | CACCTCAACGAAGTAGGAGGAGTTCTTGTTCTGGACGTTGCGCATCTGGTCCTCAACCTCCTTCATGGAAACCTTACCACG |   |   |   |   |   |   |   |   |     |
| 17             | KaEt_1 | 61.0%  | 24.9%                                                                            | CACCTCAACGAAGTAGGAGGAGTTCTTGTTCTGGACGTTGCGCATCTGGTCCTCAACCTCCTTCATGGAGACCTTACCACG |   |   |   |   |   |   |   |   |     |
| 18             | KhEt_5 | 81.4%  | 25.4%                                                                            | CACCTCAACGAAGTAGGAGGAGTTCTTGTTCTGGACGTTGCGCATCTGGTCCTCAACCTCCTTCATGGAGACCTTACCACG |   |   |   |   |   |   |   |   |     |
| 19             | KhEt_3 | 81.1%  | 24.6%                                                                            | CACCTCAACGAAGTAGGAGGAGTTCTTGTTCTGGACGTTGCGCATCTGGTCCTCAACCTCCTTCATGGAGACCTTACCACG |   |   |   |   |   |   |   |   |     |
| 20             | KhEt_4 | 82.5%  | 25.1%                                                                            | CACCTCAACGAAGTAGGAGGAGTTCTTGTTCTGGACGTTGCGCATCTGGTCCTCAACCTCCTTCATGGAGACCTTACCACG |   |   |   |   |   |   |   |   |     |
| 21             | KaEt_3 | 68.2%  | 24.9%                                                                            | CACCTCAACGAAGTAGGAGGAGTTCTTGTTCTGGACGTTGCGCATCTGGTCCTCGACCTCCTTCATGGAGACCTTACCACG |   |   |   |   |   |   |   |   |     |
| 22             | BhEt_9 | 57.5%  | 24.6%                                                                            | CACCTCAACGAAGTAGGAGGAGTTCTTGTTCTGGACGTTGCGCATCTGGTCCTCAACCTCCTTCATGGAGACCTTACCACG |   |   |   |   |   |   |   |   |     |
| 23             | BhEt_8 | 59.9%  | 25.3%                                                                            | CACCTCAACGAAGTAGGAGGAGTTCTTGTTCTGGACGTTGCGCATCTGGTCCTCAACCTCCTTCATGGAGACCTTACCACG |   |   |   |   |   |   |   |   |     |
| 24             | KaEt_6 | 82.7%  | 23.9%                                                                            | CACCTCGACGAAGTAAGATGAGTTCTTGTTCTGAACGTTGCGCATCTGGTCCTCGACCTCCTTCATGGCGACGCGGCCACG |   |   |   |   |   |   |   |   |     |
| 25             | SaEt_5 | 91.0%  | 23.4%                                                                            | CACCTCGACGAAGTAAGATGAGTTCTTGTTCTGAACGTTGCGCATCTGGTCCTCGACCTCCTTCATGGCGACGCGGCCACG |   |   |   |   |   |   |   |   |     |
| 26             | KaEt_7 | 82.2%  | 24.1%                                                                            | CACCTCGACGAAGTAAGATGAGTTCTTGTTCTGAACGTTGCGCATCTGGTCCTCGACCTCCTTCATGGCGACGCGGCCACG |   |   |   |   |   |   |   |   |     |
| 27             | KaEt_4 | 82.4%  | 24.1%                                                                            | CACCTCGACGAAGTAAGATGAGTTCTTGTTCTGAACGTTGCGCATCTGGTCCTCGACCTCCTTCATGGCGACGCGGCCACG |   |   |   |   |   |   |   |   |     |
| 28             | KaEt_9 | 77.2%  | 24.2%                                                                            | CACCTCGACGAAGTAAGATGAGTTCTTGTTCTGAACGTTGCGCATCTGGTCCTCGACCTCCTTCATGGCGACGCGGCCACG |   |   |   |   |   |   |   |   |     |
| 29             | KaEt_8 | 81.9%  | 24.1%                                                                            | CACCTCGACGAAGTAAGATGAGTTCTTGTTCTGAACGTTGCGCATCTGGTCCTCGACCTCCTTCATGGCGACGCGGCCACG |   |   |   |   |   |   |   |   |     |
| 30             | BeEt_7 | 81.8%  | 23.9%                                                                            | CACCTCGACGAAGTAAGATGAGTTCTTGTTCTGAACGTTGCGCATCTGGTCCTCGACCTCCTTCATGGCGACGCGGCCACG |   |   |   |   |   |   |   |   |     |
| 31             | BeEt_3 | 82.1%  | 23.7%                                                                            | CACCTCGACGAAGTAAGATGAGTTCTTGTTCTGAACGTTGCGCATCTGGTCCTCGACCTCCTTCATGGCGACGCGGCCACG |   |   |   |   |   |   |   |   |     |
| 32             | KhEt_8 | 82.2%  | 23.8%                                                                            | CACCTCGACGAAGTAAGATGAGTTCTTGTTCTGAACGTTGCGCATCTGGTCCTCGACCTCCTTCATGGCGACGCGGCCACG |   |   |   |   |   |   |   |   |     |
| 33             | KhEt_7 | 78.5%  | 23.9%                                                                            | CACCTCGACGAAGTAAGATGAGTTCTTGTTCTGAACGTTGCGCATCTGGTCCTCGACCTCCTTCATGGCGACGCGGCCACG |   |   |   |   |   |   |   |   |     |
| 34             | BhEt_2 | 61.8%  | 22.7%                                                                            | CACCTCAACGAAGTAGGAGGAGTTCTTGTTCTGGACGTTGCGCATCTGGTCCTCGACCTCCTTCATGGAGACCTTACCACG |   |   |   |   |   |   |   |   |     |
| 35             | BhEt_1 | 52.4%  | 18.6%                                                                            | CACCTCAACGAAGTAGGAGGAGTTCTTGTTCTGGACGTTGCGCATCTGGTCCTCGACCTCCTTCATGGAGACCTTACCACG |   |   |   |   |   |   |   |   |     |
| 36             | BeEt_4 | 83.5%  | 26.0%                                                                            | CACCTCAACGAAGTAGGAGGAGTTCTTGTTCTGGACGTTGCGCATCTGGTCCTCGACCTCCTTCATGGAGACCTTACCACG |   |   |   |   |   |   |   |   |     |
| 37             | SaEt_3 | 81.9%  | 25.0%                                                                            | CACCTCAACAAAGTAGGAAGAGTTCTTGTTCTGGACGTTGCGCATCTGGTCCTCAACCTCCTTCATGGAGACCTTACCACG |   |   |   |   |   |   |   |   |     |
| 38             | KhEt_9 | 82.7%  | 25.2%                                                                            | CACCTCAACGAAGTAGGACGAGTTCTTGTTCTGGACGTTGCGCATCTGGTCCTCAACCTCCTTCATGGAGACCTTACCACG |   |   |   |   |   |   |   |   |     |
| 39             | SaEt_4 | 82.7%  | 25.9%                                                                            | CACCTCAACGAAGTAGGAGGAGTTCTTGTTCTGGACGTTGCGCATCTGGTCCTCGACCTCCTTCATGGAGACCTTACCACG |   |   |   |   |   |   |   |   |     |
| 40             | SaEt_8 | 91.0%  | 25.3%                                                                            | CACCTCAACAAAGTAGGAAGAGTTCTTGTTCTGGACGTTGCGCATCTGGTCCTCAACCTCCTTCATGGAGACCTTACCACG |   |   |   |   |   |   |   |   |     |
| 41             | KaEt_5 | 91.7%  | 25.0%                                                                            | CACCTCAACAAAGTAGGAAGAGTTCTTGTTCTGGACGTTGCGCATCTGGTCCTCAACCTCCTTCATGGAGACCTTACCACG |   |   |   |   |   |   |   |   |     |
| 42             | KaEt_2 | 82.2%  | 25.9%                                                                            | CACCTCAACGAAGTAGGAAGAGTTCTTGTTCTGGACGTTGCGCATCTGGTCCTCAACCTCCTTCATGGAGACCTTACCACG |   |   |   |   |   |   |   |   |     |
| 43             | KhEt_6 | 82.5%  | 25.9%                                                                            | CACCTCAACGAAGTAGGAAGAGTTCTTGTTCTGGACGTTGCGCATCTGGTCCTCAACCTCCTTCATGGAGACCTTACCACG |   |   |   |   |   |   |   |   |     |
| 44             | SaEt_2 | 70.8%  | 26.0%                                                                            | CACCTCAACGAAGTAGGAAGAGTTCTTGTTCTGGACGTTGCGCATCTGGTCCTCAACCTCCTTCATGGAGACCTTACCACG |   |   |   |   |   |   |   |   |     |
| 45             | SaEt_1 | 82.4%  | 25.9%                                                                            | CACCTCAACGAAGTAGGAAGAGTTCTTGTTCTGGACGTTGCGCATCTGGTCCTCAACCTCCTTCATGGAGACCTTACCACG |   |   |   |   |   |   |   |   |     |
| consensus/100% |        |        | SSSTCsssuAssusuAsuAsTTcSSSSCsGsAsssTGsSCAsCT.....                                |                                                                                   |   |   |   |   |   |   |   |   |     |
| consensus/90%  |        |        | CACCTCuACGAAGTAsGAsGAGTTCTTGTTCTGuACGTTGCGCATCTGGTCCTCuACCTCCTTCATGsGACsssuCCuCG |                                                                                   |   |   |   |   |   |   |   |   |     |
| consensus/80%  |        |        | CACCTCuACGAAGTAsGAsGAGTTCTTGTTCTGuACGTTGCGCATCTGGTCCTCuACCTCCTTCATGsGACsssuCCuCG |                                                                                   |   |   |   |   |   |   |   |   |     |
| consensus/70%  |        |        | CACCTCAACGAAGTAUGAuGAGTTCTTGTTCTGGACGTTGCGCATCTGGTCCTCuACCTCCTTCATGsGACCTTuccACG |                                                                                   |   |   |   |   |   |   |   |   |     |
|                | cov    | pid    | 321                                                                              | .                                                                                 | . | : | . | . | . | . | . | 4 | 400 |
| 1              | BhEt_3 | 100.0% | 100.0%                                                                           | -----                                                                             |   |   |   |   |   |   |   |   |     |
| 2              | BeEt_2 | 60.7%  | 19.0%                                                                            | GCTGTTCAAAGTCAGTAAATAATTTC-----ATGCGCAAAATCGGGTTCACTCACAAAATGGCCGAGCAGGTCAGGT     |   |   |   |   |   |   |   |   |     |
| 3              | BeEt_1 | 60.7%  | 19.7%                                                                            | GCTGTTCAAAGTCAGTAAATAATTTC-----ATGCGCAAAATCGGGTTCACTCACAAAATGGCCGAGCAGGTCAGGT     |   |   |   |   |   |   |   |   |     |
| 4              | KhEt_1 | 82.5%  | 23.5%                                                                            | AAG-----TGGGCAGAGCGGGTCAGGT                                                       |   |   |   |   |   |   |   |   |     |
| 5              | BeEt_9 | 94.5%  | 24.6%                                                                            | GCTATTGAACATAATTAGCATTGAGACTCAACCAGATTTTATCTGTGATATGACTTACAAGATGGCACAGCAGGTCAGGT  |   |   |   |   |   |   |   |   |     |
| 6              | SaEt_7 | 95.0%  | 23.9%                                                                            | GCTATTGAACATAATTAGCATTGAGACTCAACCAGATTTTATCTGTGATATGACTTACAAGATGGCACAGCAGGTCAGGT  |   |   |   |   |   |   |   |   |     |
| 7              | SaEt_6 | 92.6%  | 24.3%                                                                            | GCTATTGAACATAATTAGCATTGAGACTCAACCAGATTTTATCTGTGATATGACTTACAAGATGGCACAGCAGGTCAGGT  |   |   |   |   |   |   |   |   |     |
| 8              | SaEt_9 | 93.9%  | 23.7%                                                                            | GCTATTGAACATAATTAGCATTGAGACTCAACCAGATTTTATCTGTGATATGACTTACAAGATGGCACAGCAGGTCAGGT  |   |   |   |   |   |   |   |   |     |
| 9              | BeEt_8 | 93.2%  | 22.9%                                                                            | GCTATTGAACATAATTAGCATTGAGACTCAACCAGATTTTATCTGTGATATGACTTACAAGATGGCACAGCAGGTCAGGT  |   |   |   |   |   |   |   |   |     |
| 10             | BeEt_6 | 82.5%  | 22.4%                                                                            | GCTATTGAACATAATTAGCATTGAGACTCAACCAGATTTTATCTGTGATATGACTTACAAGATGGCACAGCAGGTCAGGT  |   |   |   |   |   |   |   |   |     |
| 11             | BeEt_5 | 92.9%  | 24.2%                                                                            | GCTATTGAACATAATTAGCATTGAGACTCAACCAGATTTTATCTGTGATATGACTTACAAGATGGCACAGCAGGTCAGGT  |   |   |   |   |   |   |   |   |     |
| 12             | BhEt_7 | 82.5%  | 24.1%                                                                            | GAA-----GTAGGCAGAGCAAGTCAGGT                                                      |   |   |   |   |   |   |   |   |     |
| 13             | BhEt_6 | 84.6%  | 23.2%                                                                            | GAA-----GTAGGCAGAGCAAGTCAGGT                                                      |   |   |   |   |   |   |   |   |     |
| 14             | BhEt_5 | 88.4%  | 24.2%                                                                            | GAA-----GTAGGCAGAGCAAGTCAGGT                                                      |   |   |   |   |   |   |   |   |     |
| 15             | BhEt_4 | 90.9%  | 24.9%                                                                            | GAA-----GTAGGCAGAGCAAGTCAGGT                                                      |   |   |   |   |   |   |   |   |     |
| 16             | KhEt_2 | 80.3%  | 24.2%                                                                            | GAA-----GTAGGCAGAGCAGGTCAGGT                                                      |   |   |   |   |   |   |   |   |     |
| 17             | KaEt_1 | 61.0%  | 24.9%                                                                            | GAA-----GTAGGCAGAGCAGGTCAGGT                                                      |   |   |   |   |   |   |   |   |     |
| 18             | KhEt_5 | 81.4%  | 25.4%                                                                            | GAA-----GTAGGCAGAGCAGGTCAGGT                                                      |   |   |   |   |   |   |   |   |     |
| 19             | KhEt_3 | 81.1%  | 24.6%                                                                            | GAA-----GTAGGCAGAGCAGGTCAGGT                                                      |   |   |   |   |   |   |   |   |     |
| 20             | KhEt_4 | 82.5%  | 25.1%                                                                            | GAA-----GTAGGCAGAGCAGGTCAGGT                                                      |   |   |   |   |   |   |   |   |     |
| 21             | KaEt_3 | 68.2%  | 24.9%                                                                            | GAA-----GTAGGCCAGAGCAGGTCAGGT                                                     |   |   |   |   |   |   |   |   |     |
| 22             | BhEt_9 | 57.5%  | 24.6%                                                                            | GAA-----GTAGGCAGAGCAGGTCAGGT                                                      |   |   |   |   |   |   |   |   |     |

|                |        |        |        |                                                                                   |                                   |                  |
|----------------|--------|--------|--------|-----------------------------------------------------------------------------------|-----------------------------------|------------------|
| 23             | BhEt_8 | 59.9%  | 25.3%  | GAA-----                                                                          | -----GTAGGCAGAGCAGGT              | CAGGT            |
| 24             | KaEt_6 | 82.7%  | 23.9%  | GAA-----                                                                          | -----GATGGCTTAACAGGT              | CAGGT            |
| 25             | SaEt_5 | 91.0%  | 23.4%  | GAA-----                                                                          | -----GATGGCAGAACAGGT              | CAGGT            |
| 26             | KaEt_7 | 82.2%  | 24.1%  | GAA-----                                                                          | -----GATGGCAGAACAGGT              | CAGGT            |
| 27             | KaEt_4 | 82.4%  | 24.1%  | GAA-----                                                                          | -----GATGGCAGAACAGGT              | CAGGT            |
| 28             | KaEt_9 | 77.2%  | 24.2%  | GAA-----                                                                          | -----GATGGCAGAACAGGT              | CAGGT            |
| 29             | KaEt_8 | 81.9%  | 24.1%  | GAA-----                                                                          | -----GATGGCAGAACAGGT              | CAGGT            |
| 30             | BeEt_7 | 81.8%  | 23.9%  | GAA-----                                                                          | -----GATGGCAGAACAGGT              | CAGGT            |
| 31             | BeEt_3 | 82.1%  | 23.7%  | GAA-----                                                                          | -----GATGGCAGAACAGGT              | CAGGT            |
| 32             | KhEt_8 | 82.2%  | 23.8%  | GAA-----                                                                          | -----GATGGCAGAACAGGT              | CAGGT            |
| 33             | KhEt_7 | 78.5%  | 23.9%  | GAA-----                                                                          | -----GATGGCAGAACAGGT              | CAGGT            |
| 34             | BhEt_2 | 61.8%  | 22.7%  | GAA-----                                                                          | -----GTAGGCAGAGCAGGT              | CAGGT            |
| 35             | BhEt_1 | 52.4%  | 18.6%  | GAA-----                                                                          | -----GTAGGCAGAGCAGGT              | CAGGT            |
| 36             | BeEt_4 | 83.5%  | 26.0%  | GAA-----                                                                          | -----GTAGGCAGAGCAGGT              | CAGGT            |
| 37             | SaEt_3 | 81.9%  | 25.0%  | GAA-----                                                                          | -----GTAGGCAGAGCAGGT              | CAGGT            |
| 38             | KhEt_9 | 82.7%  | 25.2%  | GAA-----                                                                          | -----GTAGGCAGAGCAGGT              | CAGGT            |
| 39             | SaEt_4 | 82.7%  | 25.9%  | GAA-----                                                                          | -----GTAGGCAGAGCAGGT              | CAGGT            |
| 40             | SaEt_8 | 91.0%  | 25.3%  | GAA-----                                                                          | -----GTAGGCAGAGCAGGT              | CAGGT            |
| 41             | KaEt_5 | 91.7%  | 25.0%  | GAA-----                                                                          | -----GTAGGCAGAGCAGGT              | CAGGT            |
| 42             | KaEt_2 | 82.2%  | 25.9%  | GAA-----                                                                          | -----GTAGGCAGAGCAGGT              | CAGGT            |
| 43             | KhEt_6 | 82.5%  | 25.9%  | GAA-----                                                                          | -----GTAGGCAGAGCAGGT              | CAGGT            |
| 44             | SaEt_2 | 70.8%  | 26.0%  | GAA-----                                                                          | -----GTAGGCAGAGCAGGT              | CAGGT            |
| 45             | SaEt_1 | 82.4%  | 25.9%  | GAA-----                                                                          | -----GTAGGCAGAGCAGGT              | CAGGT            |
| consensus/100% |        |        |        | .....                                                                             | .....                             | .....            |
| consensus/90%  |        |        |        | Gss                                                                               | GssGGC                            | SsAuCaUGT CAGGT  |
| consensus/80%  |        |        |        | Gss                                                                               | GssGGC                            | uGAU CAGGT CAGGT |
| consensus/70%  |        |        |        | GAA                                                                               | GssGGC                            | AGAGCAGGT CAGGT  |
| cov            |        |        |        | pid                                                                               | 401                               | 480              |
| 1              | BhEt_3 | 100.0% | 100.0% | -----                                                                             | -----TCTCCGTTGTGCCCTCCCCAAGGTCT-- |                  |
| 2              | BeEt_2 | 60.7%  | 19.0%  | AGCGACCATTCGCGGAAGTCCGAAGCAGCCATCATGTTCTTGGGGTCGAACATCTGTTGGGTCAACTCAGGAACGCTGACA |                                   |                  |
| 3              | BeEt_1 | 60.7%  | 19.7%  | AGCGACCATTCGCGGAAGTCCGAAGCAGCCATCATGTTCTTGGGGTCGAACATCTGTTGGGTCAACTCAGGAACGCTGACA |                                   |                  |
| 4              | KhEt_2 | 82.5%  | 23.5%  | AACGACCGTTGCGGAAAGTTCGAAACAGCCTTCAGTTCTTGGGGTCAAACATCTGCTGGGTGACCTCGGAAACCTTGACG  |                                   |                  |
| 5              | BeEt_9 | 94.5%  | 24.6%  | AGCGACCGTTGCGGAAGTCAGAAGCAGCCATCATGTTCTTGGGGTCGAACATCTGCTGGGTGAGCTCAGGAACGCTGACG  |                                   |                  |
| 6              | SaEt_7 | 95.0%  | 23.9%  | AGCGACCGTTGCGGAAGTCAGAAGCAGCCATCATGTTCTTGGGGTCGAACATCTGCTGGGTGAGCTCAGGAACGCTGACG  |                                   |                  |
| 7              | SaEt_6 | 92.6%  | 24.3%  | AGCGACCGTTGCGGAAGTCAGAAGCAGCCATCATGTTCTTGGGGTCGAACATCTGCTGGGTGAGCTCAGGAACGCTGACG  |                                   |                  |
| 8              | SaEt_9 | 93.9%  | 23.7%  | AGCGACCGTTGCGGAAGTCAGAAGCAGCCATCATGTTCTTGGGGTCGAACATCTGCTGGGTGAGCTCAGGAACGCTGACG  |                                   |                  |
| 9              | BeEt_8 | 93.2%  | 22.9%  | AGCGACCGTTGCGGAAGTCAGAAGCAGCCATCATGTTCTTGGGGTCGAACATCTGCTGGGTGAGCTCAGGAACGCTGACG  |                                   |                  |
| 10             | BeEt_6 | 82.5%  | 22.4%  | AGCGACCGTTGCGGAAGTCAGAAGCAGCCATCATGTTCTTGGGGTCGAACATCTGCTGGGTGAGCTCAGGAACGCTGACG  |                                   |                  |
| 11             | BeEt_5 | 92.9%  | 24.2%  | AGCGACCGTTGCGGAAGTCAGAAGCAGCCATCATGTTCTTGGGGTCGAACATCTGCTGGGTGAGCTCAGGAACGCTGACG  |                                   |                  |
| 12             | BhEt_7 | 82.5%  | 24.1%  | AACGACCGTTGCGGAAGTCAGAAGCAGCCATCATGTTCTTGGGGTCGAACATCTGCTGGGTGAGCTCGGGGACGGTGACG  |                                   |                  |
| 13             | BhEt_6 | 84.6%  | 23.2%  | AACGACCGTTGCGGAAGTCAGAAGCAGCCATCATGTTCTTGGGGTCGAACATCTGCTGGGTGAGCTCGGGGACGGTGACG  |                                   |                  |
| 14             | BhEt_5 | 88.4%  | 24.2%  | AACGACCGTTGCGGAAGTCAGAAGCAGCCATCATGTTCTTGGGGTCGAACATCTGCTGGGTGAGCTCGGGGACGGTGACG  |                                   |                  |
| 15             | BhEt_4 | 90.9%  | 24.9%  | AACGACCGTTGCGGAAGTCAGAAGCAGCCATCATGTTCTTGGGGTCGAACATCTGCTGGGTGAGCTCGGGGACGGTGACG  |                                   |                  |
| 16             | KhEt_2 | 80.3%  | 24.2%  | AACGACCGTTGCGGAAGTCAGAAGCAGCCATCATGTTCTTGGGGTCGAACATCTGCTGGGTGAGCTCGGGGACGGTGACG  |                                   |                  |
| 17             | KaEt_1 | 61.0%  | 24.9%  | AACGACCGTTGCGGAAGTCGGAAGCAGCCATCATGTTCTTGGGGTCGAACATCTGCTGGGTGAGCTCGGGGACAGTGACG  |                                   |                  |
| 18             | KhEt_5 | 81.4%  | 25.4%  | AACGACCGTTGCGGAAGTCGGAAGCAGCCATCATGTTCTTGGGGTCGAACATCTGCTGGGTGAGCTCGGGGACAGTGACG  |                                   |                  |
| 19             | KhEt_3 | 81.1%  | 24.6%  | AACGACCGTTGCGGAAGTCGGAAGCAGCCATCATGTTCTTGGGGTCGAACATCTGCTGGGTGAGCTCGGGGACAGTGACG  |                                   |                  |
| 20             | KhEt_4 | 82.5%  | 25.1%  | AACGACCGTTGCGGAAGTCGGAAGCAGCCATCATGTTCTTGGGGTCGAACATCTGCTGGGTGAGCTCGGGGACAGTGACG  |                                   |                  |
| 21             | KaEt_3 | 68.2%  | 24.9%  | AACGACCGTTGCGGAAGTCAGAAGCAGCCATCATGTTCTTGGGGTCGAACATCTGCTGGGTGAGCTCGGGGACAGTGACG  |                                   |                  |
| 22             | BhEt_9 | 57.5%  | 24.6%  | AACGACCGTTGCGGAAGTCGGAAGCAGCCATCATGTTCTTGGGGTCGAACATCTGCTGGGTGAGCTCGGGGACAGTGACG  |                                   |                  |
| 23             | BhEt_8 | 59.9%  | 25.3%  | AACGACCGTTGCGGAAGTCGGAAGCAGCCATCATGTTCTTGGGGTCGAACATCTGCTGGGTGAGCTCGGGGACAGTGACG  |                                   |                  |
| 24             | KaEt_6 | 82.7%  | 23.9%  | AACGACCGTTGCGGAAGTCGGAAGCAGCCATCATGTTCTTGGGGTCGAACATCTGCTGGGTGAGCTCAGGAACGCTGACA  |                                   |                  |
| 25             | SaEt_5 | 91.0%  | 23.4%  | AACGACCGTTGCGGAAGTCGGAAGCAGCCATCATGTTCTTGGGGTCGAACATCTGCTGGGTGAGCTCAGGAACGCTGACA  |                                   |                  |
| 26             | KaEt_7 | 82.2%  | 24.1%  | AACGACCGTTGCGGAAGTCGGAAGCAGCCATCATGTTCTTGGGGTCGAACATCTGCTGGGTGAGCTCAGGAACGCTGACA  |                                   |                  |
| 27             | KaEt_4 | 82.4%  | 24.1%  | AACGACCGTTGCGGAAGTCGGAAGCAGCCATCATGTTCTTGGGGTCGAACATCTGCTGGGTGAGCTCAGGAACGCTGACA  |                                   |                  |
| 28             | KaEt_9 | 77.2%  | 24.2%  | AACGACCGTTGCGGAAGTCGGAAGCAGCCATCATGTTCTTGGGGTCGAACATCTGCTGGGTGAGCTCAGGAACGCTGACA  |                                   |                  |
| 29             | KaEt_8 | 81.9%  | 24.1%  | AACGACCGTTGCGGAAGTCGGAAGCAGCCATCATGTTCTTGGGGTCGAACATCTGCTGGGTGAGCTCAGGAACGCTGACA  |                                   |                  |
| 30             | BeEt_7 | 81.8%  | 23.9%  | AACGACCGTTGCGGAAGTCGGAAGCAGCCATCATGTTCTTGGGGTCGAACATCTGCTGGGTGAGCTCAGGAACGCTGACA  |                                   |                  |
| 31             | BeEt_3 | 82.1%  | 23.7%  | AACGACCGTTGCGGAAGTCGGAAGCAGCCATCATGTTCTTGGGGTCGAACATCTGCTGGGTGAGCTCAGGAACGCTGACA  |                                   |                  |
| 32             | KhEt_8 | 82.2%  | 23.8%  | AACGACCGTTGCGGAAGTCGGAAGCAGCCATCATGTTCTTGGGGTCGAACATCTGCTGGGTGAGCTCAGGAACGCTGACA  |                                   |                  |
| 33             | KhEt_7 | 78.5%  | 23.9%  | AACGACCGTTGCGGAAGTCGGAAGCAGCCATCATGTTCTTGGGGTCGAACATCTGCTGGGTGAGCTCAGGAACGCTGACA  |                                   |                  |
| 34             | BhEt_2 | 61.8%  | 22.7%  | AGCGACCGTTGCGGAAGTCGGAAGCAGCCATCATGTTCTTGGGGTCGAACATCTGCTGGGTGAGCTCGGGGACGGTGACG  |                                   |                  |
| 35             | BhEt_1 | 52.4%  | 18.6%  | AGCGACCGTTGCGGAAGTCGGAAGCAGCCATCATGTTCTTGGGGTCGAACATCTGCTGGGTGAGCTCGGGGACGGTGACG  |                                   |                  |
| 36             | BeEt_4 | 83.5%  | 26.0%  | AGCGACCGTTGCGGAAGTCGGAAGCAGCCATCATGTTCTTGGGGTCGAACATCTGCTGGGTGAGCTCGGGGACGGTGACG  |                                   |                  |
| 37             | SaEt_3 | 81.9%  | 25.0%  | AGCGACCGTTGCGGAAGTCGGAAGCAGCCATCATGTTCTTGGGGTCGAACATCTGCTGGGTGAGCTCGGGGACGGTGACG  |                                   |                  |
| 38             | KhEt_9 | 82.7%  | 25.2%  | AGCGACCGTTGCGGAAGTCGGAAGCAGCCATCATGTTCTTGGGGTCGAACATCTGCTGGGTGAGCTCGGGGACGGTGACG  |                                   |                  |
| 39             | SaEt_4 | 82.7%  | 25.9%  | AGCGACCGTTGCGGAAGTCGGAAGCAGCCATCATGTTCTTGGGGTCGAACATCTGCTGGGTGAGCTCGGGGACGGTGACG  |                                   |                  |
| 40             | SaEt_8 | 91.0%  | 25.3%  | AGCGACCGTTGCGGAAGTCGGAAGCAGCCATCATGTTCTTGGGGTCGAACATCTGCTGGGTGAGCTCGGGGACGGTGACG  |                                   |                  |
| 41             | KaEt_5 | 91.7%  | 25.0%  | AGCGACCGTTGCGGAAGTCGGAAGCAGCCATCATGTTCTTGGGGTCGAACATCTGCTGGGTGAGCTCGGGGACGGTGACG  |                                   |                  |
| 42             | KaEt_2 | 82.2%  | 25.9%  | AGCGACCGTTGCGGAAGTCGGAAGCAGCCATCATGTTCTTGGGGTCGAACATCTGCTGGGTGAGCTCGGGGACGGTGACG  |                                   |                  |
| 43             | KhEt_6 | 82.5%  | 25.9%  | AGCGACCGTTGCGGAAGTCGGAAGCAGCCATCATGTTCTTGGGGTCGAACATCTGCTGGGTGAGCTCGGGGACGGTGACG  |                                   |                  |
| 44             | SaEt_2 | 70.8%  | 26.0%  | AGCGACCGTTGCGGAAGTCGGAAGCAGCCATCATGTTCTTGGGGTCGAACATCTGCTGGGTGAGCTCGGGGACGGTGACG  |                                   |                  |
| 45             | SaEt_1 | 82.4%  | 25.9%  | AGCGACCGTTGCGGAAGTCGGAAGCAGCCATCATGTTCTTGGGGTCGAACATCTGCTGGGTGAGCTCGGGGACGGTGACG  |                                   |                  |
| consensus/100% |        |        |        | .....                                                                             | .....TstssssGtssscTssssAss.....   |                  |
| consensus/90%  |        |        |        | AuCGACCGTTGCGGAAGTCuGAUGCAGCCATCATGTTCTTGGGGTCGAACATstGCTGGGTsAGCTCuGGuACusTGACu  |                                   |                  |
| consensus/80%  |        |        |        | AuCGACCGTTGCGGAAGTCuGAAGCAGCCATCATGTTCTTGGGGTCGAACATCTGCTGGGTsAGCTCuGGAAACGstGACu |                                   |                  |
| consensus/70%  |        |        |        | AuCGACCGTTGCGGAAGTCuGAAGCAGCCATCATGTTCTTGGGGTCGAACATCTGCTGGGTsAGCTCuGGAAACGstGACu |                                   |                  |



|                | cov    | pid    | 481                                                                                | . | 5 | . | . | . | : | 560 |
|----------------|--------|--------|------------------------------------------------------------------------------------|---|---|---|---|---|---|-----|
| 1 BhEt_3       | 100.0% | 100.0% | -----CCGACACCGTTGTCGAG-----                                                        |   |   |   |   |   |   |     |
| 2 BeEt_2       | 60.7%  | 19.0%  | GCGCGGAAAGAGTGAGCACCACGGCTGGTCAGAGGAGCAAAATCCAACCATGAATAAGTGTAGACTAGGGAAAGGCACCAT  |   |   |   |   |   |   |     |
| 3 BeEt_1       | 60.7%  | 19.7%  | GCGCGGAAAGAGTGAGCACCACGGCTGGTCAGAGGAGCAAAATCCAACCATGAATAAGTGTAGACTAGGGAAAGGCACCAT  |   |   |   |   |   |   |     |
| 4 KhEt_1       | 82.5%  | 23.5%  | GCCG-GAAGAGTTGGGCCCCCGCGGCGGCTGAGGAGCAAAACCCAACCTGAAGAAATGAAACAGGGGAAAGGAACCTTG    |   |   |   |   |   |   |     |
| 5 BeEt_9       | 94.5%  | 24.6%  | GCGCGGAAAGAGTGGGCGCCACACGGCTGGTCAGGGGAGCGAATCCGACCATGAAGAAGTGCAGGCGAGGGAAAGGAACCAT |   |   |   |   |   |   |     |
| 6 SaEt_7       | 95.0%  | 23.9%  | GCGCGGAAAGAGTGGGCGCCACACGGCTGGTCAGGGGAGCGAATCCGACCATGAAGAAGTGCAGGCGAGGGAAAGGAACCAT |   |   |   |   |   |   |     |
| 7 SaEt_6       | 92.6%  | 24.3%  | GCGCGGAAAGAGTGGGCGCCACACGGCTGGTCAGGGGAGCGAATCCGACCATGAAGAAGTGCAGGCGAGGGAAAGGAACCAT |   |   |   |   |   |   |     |
| 8 SaEt_9       | 93.9%  | 23.7%  | GCGCGGAAAGAGTGGGCGCCACACGGCTGGTCAGGGGAGCGAATCCGACCATGAAGAAGTGCAGGCGAGGGAAAGGAACCAT |   |   |   |   |   |   |     |
| 9 BeEt_8       | 93.2%  | 22.9%  | GCGCGGAAAGAGTGGGCGCCACACGGCTGGTCAGGGGAGCGAATCCGACCATGAAGAAGTGCAGGCGAGGGAAAGGAACCAT |   |   |   |   |   |   |     |
| 10 BeEt_6      | 82.5%  | 22.4%  | GCGCGGAAAGAGTGGGCGCCACACGGCTGGTCAGGGGAGCGAATCCGACCATGAAGAAGTGCAGGCGAGGGAAAGGAACCAT |   |   |   |   |   |   |     |
| 11 BeEt_5      | 92.9%  | 24.2%  | GCGCGGAAAGAGTGGGCGCCACACGGCTGGTCAGGGGAGCGAATCCGACCATGAAGAAGTGCAGGCGAGGGAAAGGAACCAT |   |   |   |   |   |   |     |
| 12 BhEt_7      | 82.5%  | 24.1%  | GCGCGGAAGGAGTGGGCGCCACGGCTGGTCAGAGGAGCGAAACCGACCATGAAGAAGTGGAGACGGGGGAA-----       |   |   |   |   |   |   |     |
| 13 BhEt_6      | 84.6%  | 23.2%  | GCGCGGAAGGAGTGGGCGCCACGGCTGGTCAGAGGAGCGAAACCGACCATGAAGAAGTGGAGACGGGGGAAAGGGAACCAT  |   |   |   |   |   |   |     |
| 14 BhEt_5      | 88.4%  | 24.2%  | GCGCGGAAGGAGTGGGCGCCACGGCTGGTCAGAGGAGCGAAACCGACCATGAAGAAGTGGAGACGGGGGAAAGGGAACCAT  |   |   |   |   |   |   |     |
| 15 BhEt_4      | 90.9%  | 24.9%  | GCGCGGAAGGAGTGGGCGCCACGGCTGGTCAGAGGAGCGAAACCGACCATGAAGAAGTGGAGACGGGGGAAAGGGAACCAT  |   |   |   |   |   |   |     |
| 16 KhEt_2      | 80.3%  | 24.2%  | GCGCGGAAGGAGTGGGCGCCACGGCTGGTCAGAGGAGCGAAACCGACCATGAAGAAGTGGAGACGGGGGAAAGGGAACCAT  |   |   |   |   |   |   |     |
| 17 KaEt_1      | 61.0%  | 24.9%  | GCACGGAAGGAGTGGGCGCCACGGCTGGTCAGAGGAGCGAAACCGACCATGAAGAAGTGGAGACGGGGGAAAGGGAACCAT  |   |   |   |   |   |   |     |
| 18 KhEt_5      | 81.4%  | 25.4%  | GCACGGAAGGAGTGGGCGCCACGGCTGGTCAGAGGAGCGAAACCGACCATGAAGAAGTGGAGACGGGGGAAAGGGAACCAT  |   |   |   |   |   |   |     |
| 19 KhEt_3      | 81.1%  | 24.6%  | GCACGGAAGGAGTGGGCGCCACGGCTGGTCAGAGGAGCGAAACCGACCATGAAGAAGTGGAGACGGGGGAAAGGGAACCAT  |   |   |   |   |   |   |     |
| 20 KhEt_4      | 82.5%  | 25.1%  | GCACGGAAGGAGTGGGCGCCACGGCTGGTCAGAGGAGCGAAACCGACCATGAAGAAGTGGAGACGGGGGAAAGGGAACCAT  |   |   |   |   |   |   |     |
| 21 KaEt_3      | 68.2%  | 24.9%  | GCACGGAAGGAGTGGGCGCCACGGCTGGTCAGAGGAGCGAAACCGACCATGAAGAAGTGGAGACGGGGGAAAGGGAACCAT  |   |   |   |   |   |   |     |
| 22 BhEt_9      | 57.5%  | 24.6%  | -----GGTCAGAGGAGCGAAACCGACCATGAAGAAGTGGAGACGGGGGAAAGGGAACCAT                       |   |   |   |   |   |   |     |
| 23 BhEt_8      | 59.9%  | 25.3%  | GCACGGAAGGAGTGGGCGCCACGGCTGGTCAGAGGAGCGAAACCGACCATGAAGAAGTGGAGACGGGGGAAAGGGAACCAT  |   |   |   |   |   |   |     |
| 24 KaEt_6      | 82.7%  | 23.9%  | GCGCGGAAAGAGTGAGCACCACGGCTGGTCAGGGGAGCGAAGCCGACCATGAAGAAGTGGAGACGAGGGAAAGGAACCAT   |   |   |   |   |   |   |     |
| 25 SaEt_5      | 91.0%  | 23.4%  | GCGCGGAAAGAGTGAGCACCACGGCTGGTCAGGGGAGCGAAGCCGACCATGAAGAAGTGGAGACGAGGGAAAGGAACCAT   |   |   |   |   |   |   |     |
| 26 KaEt_7      | 82.2%  | 24.1%  | GCGCGGAAAGAGTGAGCACCACGGCTGGTCAGGGGAGCGAAGCCGACCATGAAGAAGTGGAGACGAGGGAAAGGAACCAT   |   |   |   |   |   |   |     |
| 27 KaEt_4      | 82.4%  | 24.1%  | GCGCGGAAAGAGTGAGCACCACGGCTGGTCAGGGGAGCGAAGCCGACCATGAAGAAGTGGAGACGAGGGAAAGGAACCAT   |   |   |   |   |   |   |     |
| 28 KaEt_9      | 77.2%  | 24.2%  | GCGCGGAAAGAGTGAGCACCACGGCTGGTCAGGGGAGCGAAGCCGACCATGAAGAAGTGGAGACGAGGGAAAGGAACCAT   |   |   |   |   |   |   |     |
| 29 KaEt_8      | 81.9%  | 24.1%  | GCGCGGAAAGAGTGAGCACCACGGCTGGTCAGGGGAGCGAAGCCGACCATGAAGAAGTGGAGACGAGGGAAAGGAACCAT   |   |   |   |   |   |   |     |
| 30 BeEt_7      | 81.8%  | 23.9%  | GCGCGGAAAGAGTGAGCACCACGGCTGGTCAGGGGAGCGAAGCCGACCATGAAGAAGTGGAGACGAGGGAAAGGAACCAT   |   |   |   |   |   |   |     |
| 31 BeEt_3      | 82.1%  | 23.7%  | GCGCGGAAAGAGTGAGCACCACGGCTGGTCAGGGGAGCGAAGCCGACCATGAAGAAGTGGAGACGAGGGAAAGGAACCAT   |   |   |   |   |   |   |     |
| 32 KhEt_8      | 82.2%  | 23.8%  | GCGCGGAAAGAGTGAGCACCACGGCTGGTCAGGGGAGCGAAGCCGACCATGAAGAAGTGGAGACGAGGGAAAGGAACCAT   |   |   |   |   |   |   |     |
| 33 KhEt_7      | 78.5%  | 23.9%  | GCGCGGAAAGAGTGAGCACCACGGCTGGTCAGGGGAGCGAAGCCGACCATGAAGAAGTGGAGACGAGGGAAAGGAACCAT   |   |   |   |   |   |   |     |
| 34 BhEt_2      | 61.8%  | 22.7%  | GCGCGGAAGGAGTGGGCGCCGCGCTGGTGAGGGGAGCGAATCCGACCATGAAGAAGTGGAGACGGGGGAAAGGGAACCAT   |   |   |   |   |   |   |     |
| 35 BhEt_1      | 52.4%  | 18.6%  | GCGCGGAAGGAGTGGGCGCCGCGCTGGTGAGGGGAGCGAATCCGACCATGAAGAAGTGGAGACGGGGGAAAGGGAACCAT   |   |   |   |   |   |   |     |
| 36 BeEt_4      | 83.5%  | 26.0%  | GCGCGGAAGGAGTGGGCGCCGCGCTGGTGAGGGGAGCGAATCCGACCATGAAGAAGTGGAGACGGGGGAAAGGGAACCAT   |   |   |   |   |   |   |     |
| 37 SaEt_3      | 81.9%  | 25.0%  | GCGCGGAAGGAGTGGGCGCCACGGCTGGTAAGAGGAGCGAAACCAACCATGAAGAAGTGGAGACGGGGGAAAGGGAACCAT  |   |   |   |   |   |   |     |
| 38 KhEt_9      | 82.7%  | 25.2%  | GCGCGGAAGGAGTGGGCGCCACGGCTGGTAAGAGGAGCGAAACCAACCATGAAGAAGTGGAGACGGGGGAAAGGGAACCAT  |   |   |   |   |   |   |     |
| 39 SaEt_4      | 82.7%  | 25.9%  | GCGCGGAAGGAGTGGGCGCCGCGCTGGTGAGGGGAGCGAATCCGACCATGAAGAAGTGGAGACGGGGGAAAGGGAACCAT   |   |   |   |   |   |   |     |
| 40 SaEt_8      | 91.0%  | 25.3%  | GCGCGGAAGGAGTGGCGCCACGGCTGGTAAGAGGAGCGAAACCAACCATGAAGAAGTGGAGACGGGGGAAAGGGAACCAT   |   |   |   |   |   |   |     |
| 41 KaEt_5      | 91.7%  | 25.0%  | GCGCGGAAGGAGTGGGCGCCACGGCTGGTAAGAGGAGCGAAACCAACCATGAAGAAGTGGAGACGGGGGAAAGGGAACCAT  |   |   |   |   |   |   |     |
| 42 KaEt_2      | 82.2%  | 25.9%  | GCGCGGAAGGAGTGGGCGCCACGGCTGGTGAGAGGAGCGAAACCAACCATGAAGAAGTGGAGACGAGGGAAAGGGAACCAT  |   |   |   |   |   |   |     |
| 43 KhEt_6      | 82.5%  | 25.9%  | GCGCGGAAGGAGTGGGCGCCACGGCTGGTGAGAGGAGCGAAACCAACCATGAAGAAGTGGAGACGAGGGAAAGGGAACCAT  |   |   |   |   |   |   |     |
| 44 SaEt_2      | 70.8%  | 26.0%  | GCGCGGAAGGAGTGGGCGCCACGGCTGGTGAGAGGAGCGAAACCAACCATGAAGAAGTGGAGACGAGGGAAAGGGAACCAT  |   |   |   |   |   |   |     |
| 45 SaEt_1      | 82.4%  | 25.9%  | GCGCGGAAGGAGTGGGCGCCACGGCTGGTGAGAGGAGCGAAACCAACCATGAAGAAGTGGAGACGAGGGAAAGGGAACCAT  |   |   |   |   |   |   |     |
| consensus/100% |        |        | .....GSSSAG.....                                                                   |   |   |   |   |   |   |     |
| consensus/90%  |        |        | GCuCGGAAuGAGTsuGcuCCuCGCTGGTsAGuGGAGCGAAsCCuACCATGAAGAAGTGSAGuCGuGGGAAuGGAACCAT    |   |   |   |   |   |   |     |
| consensus/80%  |        |        | GCGCGGAAuGAGTGuGcuCCACGGCTGGTsAGuGGAGCGAAsCCuACCATGAAGAAGTGSAGACGuGGGAAuGGAACCAT   |   |   |   |   |   |   |     |
| consensus/70%  |        |        | GCGCGGAAuGAGTGuGcuCCACGGCTGGTCAGuGGAGCGAAsCCGACCATGAAGAAGTGGAGACGuGGGAAuGGAACCAT   |   |   |   |   |   |   |     |

|           | cov    | pid    | 561                                                                                 | . | 6 | . | . | . | . | 640 |
|-----------|--------|--------|-------------------------------------------------------------------------------------|---|---|---|---|---|---|-----|
| 1 BhEt_3  | 100.0% | 100.0% | -----CCCTACAACGCCACTCTCTCCAT                                                        |   |   |   |   |   |   |     |
| 2 BeEt_2  | 60.7%  | 19.0%  | GTTGACGGCGAGCTTTCCGAGATCGGAGTTCAGCTGACCGGGGAAACGGATACAGGTGGTGACACCGGACATACATCAG     |   |   |   |   |   |   |     |
| 3 BeEt_1  | 60.7%  | 19.7%  | GTTGACGGCGAGCTTTCCGAGATCGGAGTTCAGCTGACCGGGGAAACGGATACAGGTGGTGACACCGGACATACATCAG     |   |   |   |   |   |   |     |
| 4 KhEt_1  | 82.5%  | 23.5%  | GTTAACGGCGAGCTTTCCGAGGTTCAAATTTCACTTGACCGGGAAACCGAGACCGGGTGGTGACCCCGACATGACGGCGG    |   |   |   |   |   |   |     |
| 5 BeEt_9  | 94.5%  | 24.6%  | GTTGACGGCGAGCTTTCCGAGGTTCAAATTTCACTTGACCGGGAAACCGAGACCGGGTGGTGACCCCGACATGACGGCGG    |   |   |   |   |   |   |     |
| 6 SaEt_7  | 95.0%  | 23.9%  | GTTGACGGCGAGCTTTCCGAGGTTCAAATTTCACTTGACCGGGAAACCGAGACCGGGTGGTGACCCCGACATGACGGCGG    |   |   |   |   |   |   |     |
| 7 SaEt_6  | 92.6%  | 24.3%  | GTTGACGGCGAGCTTTCCGAGGTTCAAATTTCACTTGACCGGGAAACCGAGACCGGGTGGTGACCCCGACATGACGGCGG    |   |   |   |   |   |   |     |
| 8 SaEt_9  | 93.9%  | 23.7%  | GTTGACGGCGAGCTTTCCGAGGTTCAAATTTCACTTGACCGGGAAACCGAGACCGGGTGGTGACCCCGACATGACGGCGG    |   |   |   |   |   |   |     |
| 9 BeEt_8  | 93.2%  | 22.9%  | GTTGACGGCGAGCTTTCCGAGGTTCAAATTTCACTTGACCGGGAAACCGAGACCGGGTGGTGACCCCGACATGACGGCGG    |   |   |   |   |   |   |     |
| 10 BeEt_6 | 82.5%  | 22.4%  | GTTGACGGCGAGCTTTCCGAGGTTCAAATTTCACTTGACCGGGAAACCGAGACCGGGTGGTGACCCCGACATGACGGCGG    |   |   |   |   |   |   |     |
| 11 BeEt_5 | 92.9%  | 24.2%  | GTTGACGGCGAGCTTTCCGAGGTTCAAATTTCACTTGACCGGGAAACCGAGACCGGGTGGTGACCCCGACATGACGGCGG    |   |   |   |   |   |   |     |
| 12 BhEt_7 | 82.5%  | 24.1%  | -----GTTGACGGCCAACTTCTCAGGTGAGAGTTCAACTGACCGGGGAAACCGAGGAGGTGGTGACACCCGACATGACGGCGG |   |   |   |   |   |   |     |
| 13 BhEt_6 | 84.6%  | 23.2%  | GTTGACGGCCAACTTCTCAGGTGAGAGTTCAACTGACCGGGGAAACCGAGGAGGTGGTGACACCCGACATGACGGCGG      |   |   |   |   |   |   |     |
| 14 BhEt_5 | 88.4%  | 24.2%  | GTTGACGGCCAACTTCTCAGGTGAGAGTTCAACTGACCGGGGAAACCGAGGAGGTGGTGACACCCGACATGACGGCGG      |   |   |   |   |   |   |     |
| 15 BhEt_4 | 90.9%  | 24.9%  | GTTGACGGCCAACTTCTCAGGTGAGAGTTCAACTGACCGGGGAAACCGAGGAGGTGGTGACACCCGACATGACGGCGG      |   |   |   |   |   |   |     |
| 16 KhEt_2 | 80.3%  | 24.2%  | GTTGACGGCCAACTTCTCAGGTGAGAGTTCAACTGACCGGGGAAACCGAGGAGGTGGTGACACCCGACATGACGGCGG      |   |   |   |   |   |   |     |
| 17 KaEt_1 | 61.0%  | 24.9%  | GTTGACGGCCAACTTCTCAGGTGAGAGTTCAACTGACCGGGGAAACCGAGGAGGTGGTGACACCCGACATGACGGCTG      |   |   |   |   |   |   |     |
| 18 KhEt_5 | 81.4%  | 25.4%  | GTTGACGGCCAACTTCTCAGGTGAGAGTTCAACTGACCGGGGAAACCGAGGAGGTGGTGACACCCGACATGACGGCGG      |   |   |   |   |   |   |     |
| 19 KhEt_3 | 81.1%  | 24.6%  | GTTGACGGCCAACTTCTCAGGTGAGAGTTCAACTGACCGGGGAAACCGAGGAGGTGGTGACACCCGACATGACGGCGG      |   |   |   |   |   |   |     |
| 20 KhEt_4 | 82.5%  | 25.1%  | GTTGACGGCCAACTTCTCAGGTGAGAGTTCAACTGACCGGGGAAACCGAGGAGGTGGTGACACCCGACATGACGGCGG      |   |   |   |   |   |   |     |
| 21 KaEt_3 | 68.2%  | 24.9%  | GTTGACGGCCAACTTCTCAGGTGAGAGTTCAACTGACCGGGGAAACCGAGGAGGTGGTGACACCCGACATGACGGCGG      |   |   |   |   |   |   |     |
| 22 BhEt_9 | 57.5%  | 24.6%  | GTTGACGGCCAACTTCTCAGGTGAGAGTTCAACTGACCGGGGAAACCGAGGAGGTGGTGACACCCGACATGACGGCGG      |   |   |   |   |   |   |     |
| 23 BhEt_8 | 59.9%  | 25.3%  | GTTGACGGCCAACTTCTCAGGTGAGAGTTCAACTGACCGGGGAAACCGAGGAGGTGGTGACACCCGACATGACGGCGG      |   |   |   |   |   |   |     |
| 24 KaEt_6 | 82.7%  | 23.9%  | GTTGACGGCGAGCTTTCCGAGGTGATAGTTCACTGACCGGGGAAACCGAGACAGGTGGTGACGCGGACATGACGGCGG      |   |   |   |   |   |   |     |
| 25 SaEt_5 | 91.0%  | 23.4%  | GTTGACGGCGAGCTTTCCGAGGTGATAGTTCACTGACCGGGGAAACCGAGACAGGTGGTGACGCGGACATGACGGCGG      |   |   |   |   |   |   |     |

26 KaEt\_7 82.2% 24.1% GTTGACGGCGAGCTTTCCGAGGTACAGAGTTACAGTACACCGGGGAAACGGAGACAGGTGGTGACGCCGGACATGACGGCGG  
27 KaEt\_4 82.4% 24.1% GTTGACGGCGAGCTTTCCGAGGTACAGAGTTACAGTACACCGGGGAAACGGAGACAGGTGGTGACGCCGGACATGACGGCGG  
28 KaEt\_9 77.2% 24.2% GTTGACGGCGAGCTTTCCGAGGTACAGAGTTACAGTACACCGGGGAAACGGAGACAGGTGGTGACGCCGGACATGACGGCGG  
29 KaEt\_8 81.9% 24.1% GTTGACGGCGAGCTTTCCGAGGTACAGAGTTACAGTACACCGGGGAAACGGAGACAGGTGGTGACGCCGGACATGACGGCGG  
30 BeEt\_7 81.8% 23.9% GTTGACGGCGAGCTTTCCGAGGTACAGAGTTACAGTACACCGGGGAAACGGAGACAGGTGGTGACGCCGGACATGACGGCGG  
31 BeEt\_3 82.1% 23.7% GTTGACGGCGAGCTTTCCGAGGTACAGAGTTACAGTACACCGGGGAAACGGAGACAGGTGGTGACGCCGGACATGACGGCGG  
32 KhEt\_8 82.2% 23.8% GTTGACGGCGAGCTTTCCGAGGTACAGAGTTACAGTACACCGGGGAAACGGAGACAGGTGGTGACGCCGGACATGACGGCGG  
33 KhEt\_7 78.5% 23.9% GTTGACGGCGAGCTTTCCGAGGTACAGAGTTACAGTACACCGGGGAAACGGAGACAGGTGGTGACGCCGGACATGACGGCGG  
34 BhEt\_2 61.8% 22.7% GTTGACGGCGAGCTTTCCGAGGTACAGAGTTAGAGTACACCGGGGAAACGGAGACAGGTGGTGACGCCGGACATGACGGCGG  
35 BhEt\_1 52.4% 18.6% GTTGACGGCGAGCTTTCCGAGGTACAGAGTTAGAGTACACCGGGGAAACGGAGACAGGTGGTGACGCCGGACATGACGGCGG  
36 BeEt\_4 83.5% 26.0% GTTGACGGCGAGCTTTCCGAGGTACAGAGTTAGAGTACACCGGGGAAACGGAGACAGGTGGTGACGCCGGACATGACGGCGG  
37 SaEt\_3 81.9% 25.0% GTTGACGGCGAGCTTTCCGAGGTACAGAGTTAGAGTACACCGGGGAAACGGAGACAGGTGGTGACGCCGGACATGACGGCGG  
38 KhEt\_9 82.7% 25.2% GTTGACGGCGAGCTTTCCGAGGTACAGAGTTAGAGTACACCGGGGAAACGGAGACAGGTGGTGACGCCGGACATGACGGCGG  
39 SaEt\_4 82.7% 25.9% GTTGACGGCGAGCTTTCCGAGGTACAGAGTTAGAGTACACCGGGGAAACGGAGACAGGTGGTGACGCCGGACATGACGGCGG  
40 SaEt\_8 91.0% 25.3% GTTGACGGCGAGCTTTCCGAGGTACAGAGTTAGAGTACACCGGGGAAACGGAGACAGGTGGTGACGCCGGACATGACGGCGG  
41 KaEt\_5 91.7% 25.0% GTTGACGGCGAGCTTTCCGAGGTACAGAGTTAGAGTACACCGGGGAAACGGAGACAGGTGGTGACGCCGGACATGACGGCGG  
42 KaEt\_2 82.2% 25.9% GTTGACGGCGAGCTTTCCGAGGTACAGAGTTAGAGTACACCGGGGAAACGGAGACAGGTGGTGACGCCGGACATGACGGCGG  
43 KhEt\_6 82.5% 25.9% GTTGACGGCGAGCTTTCCGAGGTACAGAGTTAGAGTACACCGGGGAAACGGAGACAGGTGGTGACGCCGGACATGACGGCGG  
44 SaEt\_2 70.8% 26.0% GTTGACGGCGAGCTTTCCGAGGTACAGAGTTAGAGTACACCGGGGAAACGGAGACAGGTGGTGACGCCGGACATGACGGCGG  
45 SaEt\_1 82.4% 25.9% GTTGACGGCGAGCTTTCCGAGGTACAGAGTTAGAGTACACCGGGGAAACGGAGACAGGTGGTGACGCCGGACATGACGGCGG  
consensus/100% GTTGACGGCGAGCTTTCCGAGGTACAGAGTTAGAGTACACCGGGGAAACGGAGACAGGTGGTGACGCCGGACATGACGGCGG  
consensus/90% GTTGACGGCGAGCTTTCCGAGGTACAGAGTTAGAGTACACCGGGGAAACGGAGACAGGTGGTGACGCCGGACATGACGGCGG  
consensus/80% GTTGACGGCGAGCTTTCCGAGGTACAGAGTTAGAGTACACCGGGGAAACGGAGACAGGTGGTGACGCCGGACATGACGGCGG  
consensus/70% GTTGACGGCGAGCTTTCCGAGGTACAGAGTTAGAGTACACCGGGGAAACGGAGACAGGTGGTGACGCCGGACATGACGGCGG  
cov pid 641 : . . . . . 7 . . . . . 720  
1 BhEt\_3 100.0% 100.0% CCACCAGCTTGTGCGAAGCTCTGA-CGAGACCTTCTGTATCGACAACGAGGCCCTCTACGACATCTGCATGAGGACCTC  
2 BeEt\_2 60.7% 19.0% ATCGAGGTAGTTGAGGGTCACCGTATGATGGGTTGGACAGCTTC--AGGTGCGCA-TGCATATTTCTTAGAGG-TCCTC  
3 BeEt\_1 60.7% 19.7% ATCGAGGTAGTTGAGGGTCACCGTATGATGGGTTGGACAGCTTC--AGGTGCGCA-TGCATATTTCTTAGAGG-TCCTC  
4 KhEt\_4 82.5% 23.5% AAACAGGTGGTCCAGGTCCCGTAAGAGGGGTTGACGACTTG--AGAGTGCAGTGCATGCAATGCTCTAA--AGGCCCTC  
5 BeEt\_9 94.5% 24.6% AGACCAGGTAGTTCAGGTACCCGTACGTAGGGTTAGACAGCTTG--AGGGTTCTCATGCGAGATATCGTACAGA-GCCTC  
6 SaEt\_7 95.0% 23.9% AGACCAGGTAGTTCAGGTACCCGTACGTAGGGTTAGACAGCTTG--AGGGTTCTCATGCGAGATATCGTACAGA-GCCTC  
7 SaEt\_6 92.6% 24.3% AGACCAGGTAGTTCAGGTACCCGTACGTAGGGTTAGACAGCTTG--AGGGTTCTCATGCGAGATATCGTACAGA-GCCTC  
8 SaEt\_9 93.9% 23.7% AGACCAGGTAGTTCAGGTACCCGTACGTAGGGTTAGACAGCTTG--AGGGTTCTCATGCGAGATATCGTACAGA-GCCTC  
9 BeEt\_8 93.2% 22.9% AGACCAGGTAGTTCAGGTACCCGTACGTAGGGTTAGACAGCTTG--AGGGTTCTCATGCGAGATATCGTACAGA-GCCTC  
10 BeEt\_6 82.5% 22.4% AGACCAGGTAGTTCAGGTACCCGTACGTAGGGTTAGACAGCTTG--AGGGTTCTCATGCGAGATATCGTACAGA-GCCTC  
11 BeEt\_5 92.9% 24.2% AGACCAGGTAGTTCAGGTACCCGTACGTAGGGTTAGACAGCTTG--AGGGTTCTCATGCGAGATATCGTACAGA-GCCTC  
12 BhEt\_7 82.5% 24.1% -----GGGGTTGAGCTTG--AGAGTCTCATGCGAGATGTCGTAGAGG-GCCTC  
13 BhEt\_6 84.6% 23.2% AGACGAGGTGGTTCAGGTACCCGTAGGAGGGGTTGTTGAGCTTG--AGAGTCTCATGCGAGATGTCGTAGAGG-GCCTC  
14 BhEt\_5 88.4% 24.2% AGACGAGGTGGTTCAGGTACCCGTAGGAGGGGTTGTTGAGCTTG--AGAGTCTCATGCGAGATGTCGTAGAGG-GCCTC  
15 BhEt\_4 90.9% 24.9% AGACGAGGTGGTTCAGGTACCCGTAGGAGGGGTTGTTGAGCTTG--AGAGTCTCATGCGAGATGTCGTAGAGG-GCCTC  
16 KhEt\_2 80.3% 24.2% AGACGAGGTGGTTCAGGTACCCGTAGGAGGGGTTGTTGAGCTTG--AGAGTCTCATGCGAGATGTCGTATAGG-GCCTC  
17 KaEt\_1 61.0% 24.9% A-ACGAGGTGGTTCAGGTACCCGTAGGAGGGGTTGTTGAGCTTG--AGAGTCTCATGCGAGATGTCGTAGAGGGGCTC  
18 KhEt\_5 81.4% 25.4% AGACGAGGTGGTTCAGGTACCCGTAGGAGGGGTTGTTGAGCTTG--AGGGTCTCATGCGAGATGTCGTAGAGG-GCCTC  
19 KhEt\_3 81.1% 24.6% AGACGAGGTGGTTCAGGTACCCGTAGGAGGGGTTGTTGAGCTTG--AGGGTCTCATGCGAGATGTCGTAGAGG-GCCTC  
20 KhEt\_4 82.5% 25.1% AGACGAGGTGGTTCAGGTACCCGTAGGAGGGGTTGTTGAGCTTG--AGAGTCTCATGCGAGATGTCGTAGAGG-GCCTC  
21 KaEt\_3 68.2% 24.9% AGACGAGGTGGTTCAGGTACCCGTAGGAGGGGTTGTTGAGCTTG--AGGGTCTCATGCGAGATGTCGTAGAGG-GCCTC  
22 BhEt\_9 57.5% 24.6% AGACGAGGTGGTTCAGGTACCCGTAGGAGGGGTTGTTGAGCTTG--AGGGTCTCATGCGAGATGTCGTAGAGG-GCCTC  
23 BhEt\_8 59.9% 25.3% AGACGAGGTGGTTCAGGTACCCGTAGGAGGGGTTGTTGAGCTTG--AGGGTCTCATGCGAGATGTCGTAGAGG-GCCTC  
24 KaEt\_6 82.7% 23.9% AGACTAGGTATTTCAAGTCGCGCTAAGAGGGGTTGGACAGCTTG--AGGGTGCAGTGCAGATGTCGTAAGG-GCCTC  
25 SaEt\_5 91.0% 23.4% AGACGAGGTAGTTCAGTCGCCGTAAAGAGGGGTTGGACAGCTTG--AGGGTGCAGTGCAGATGTCGTAAGG-GCCTC  
26 KaEt\_7 82.2% 24.1% AGACGAGGTAGTTCAGTCGCCGTAAAGAGGGGTTGGACAGCTTG--AGGGTGCAGTGCAGATGTCGTAAGG-GCCTC  
27 KaEt\_4 82.4% 24.1% AGACGAGGTAGTTCAGTCGCCGTAAAGAGGGGTTGGACAGCTTG--AGGGTGCAGTGCAGATGTCGTAAGG-GCCTC  
28 KaEt\_9 77.2% 24.2% AGACGAGGTAGTTCAGTCGCCGTAAAGAGGGGTTGGACAGCTTG--AGGGTGCAGTGCAGATGTCGTAAGG-GCCTC  
29 BeEt\_7 81.9% 24.1% AGACGAGGTAGTTCAGTCGCCGTAAAGAGGGGTTGGACAGCTTG--AGGGTGCAGTGCAGATGTCGTAAGG-GCCTC  
30 KaEt\_8 81.8% 23.9% AGACGAGGTAGTTCAGTCGCCGTAAAGAGGGGTTGGACAGCTTG--AGGGTGCAGTGCAGATGTCGTAAGG-GCCTC  
31 BeEt\_3 82.1% 23.7% AGACGAGGTAGTTCAGTCGCCGTAAAGAGGGGTTGGACAGCTTG--AGGGTGCAGTGCAGATGTCGTAAGG-GCCTC  
32 KhEt\_8 82.2% 23.8% AGACGAGGTAGTTCAGTCGCCGTAAAGAGGGGTTGGACAGCTTG--AGGGTGCAGTGCAGATGTCGTAAGG-GCCTC  
33 BhEt\_7 78.5% 23.9% AGACGAGGTAGTTCAGTCGCCGTAAAGAGGGGTTGGACAGCTTG--AGGGTGCAGTGCAGATGTCGTAAGG-GCCTC  
34 KhEt\_2 61.8% 22.7% AAACGAGGTGGTTCAGGTCCCGTAAAGAGGGGTTGTCATCTTG--AGAGTCTCATGCGCGATTGCTATAAG-GCCTT  
35 BhEt\_1 52.4% 18.6% AAACGAGGTGGTTCAGGTCCCGTAGGAGGGGTTGTCATCTTG--AGAGTCTCATGCGCGATTGCTATAAG-GCCTT  
36 BeEt\_4 83.5% 26.0% AAACGAGGTGGTTCAGGTCCCGTA-GAGGGGTTGTCAGCTTG--AGAGTCTCATGCGAGATGTCGTAGAGA-GCCTC  
37 SaEt\_3 81.9% 25.0% ATACGAGGTGGTTCAGGTACCCGTACTAGGGGTTGTCAGCTTG--AGGGTCTCATGCAATATGTCGTAGAGA-GCCTC  
38 KhEt\_9 82.7% 25.2% AAACGAGGTGGTTCAGGTACCCGTACGAGGGGTTGTCAGCTTG--AGGGTCTCATGCAATATGTCGTAGAGA-GCCTC  
39 SaEt\_4 82.7% 25.9% A-ACGAGGTGGTTCAGGTCCCGTAGGAGGGGTTGTCAGCTTG--AGAGTCTCATGCGAGATGTCGTAGAGA-GCCTC  
40 SaEt\_8 91.0% 25.3% AGACGAGGTGGTTCAGGTACCCGTACGAGGGGTTGTCAGCTTG--AGGGTCTCATGCAATATGTCGTAGAGA-GCCTC  
41 KaEt\_5 91.7

2 BeEt\_2 60.7% 19.7% TTTATCGATTTC-TAATGTCTCTTCGGAGTTCCTACCATCTTT---GAACGGATATGTTGTTTTTTTGTCTCATCTACT  
 3 BeEt\_1 60.7% 19.7% TTTATCGATTTC-TAATGTCTCTTCGGAGTTCCTACCATCTTT---GAACGGATATGTTGTTTTTTTGTCTCATCTACT  
 4 KhEt\_1 82.5% 23.5% GTTATCCATACAAAAGGTCCTGTCGGATT--CTCGACCAACCTGTGGACTGAAAGAGTAGCGTTGTAAAGCTCAACAACG  
 5 BeEt\_9 94.5% 24.6% GTTGTGATACAGAAGGTCCTGTCGGAGTTC-TCGACAAGCTGGTGAACGGAGAGAGTGGCGTTGTAAAGCTCAACAACG  
 6 SaEt\_7 95.0% 23.9% GTTGTGATACAGAAGGTCCTGTCGGAGTTC-TCGACAAGCTGGTGAACGGAGAGAGTGGCGTTGTAAAGCTCAACAACG  
 7 SaEt\_6 92.6% 24.3% GTTGTGATACAGAAGGTCCTGTCGGAGTTC-TCGACAAGCTGGTGAACGGAGAGAGTGGCGTTGTAAAGCTCAACAACG  
 8 SaEt\_9 93.9% 23.7% GTTGTGATACAGAAGGTCCTGTCGGAGTTC-TCGACAAGCTGGTGAACGGAGAGAGTGGCGTTGTAAAGCTCAACAACG  
 9 BeEt\_8 93.2% 22.9% GTTGTGATACAGAAGGTCCTGTCGGAGTTC-TCGACAAGCTGGTGAACGGAGAGAGTGGCGTTGTAAAGCTCAACAACG  
 10 BeEt\_6 82.5% 22.4% GTTGTGATACAGAAGGTCCTGTCGGAGTTC-TCGACAAGCTGGTGAACGGAGAGAGTGGCGTTGTAAAGCTCAACAACG  
 11 BeEt\_5 92.9% 24.2% GTTGTGATACAGAAGGTCCTGTCGGAGTTC-TCGACAAGCTGGTGAACGGAGAGAGTGGCGTTGTAAAGCTCAACAACG  
 12 BhEt\_7 82.5% 24.1% GTTGTGATACAGAAGGTCCTGTCGGAGTTC-TCGACAAGCTGGTGGATGGAGAGGGTGGCGTTGTAGGGCTCGACAACG  
 13 BhEt\_6 84.6% 23.2% GTTGTGATACAGAAGGTCCTGTCGGAGTTC-TCGACAAGCTGGTGGATGGAGAGGGTGGCGTTGTAGGGCTCGACAACG  
 14 BhEt\_5 88.4% 24.2% GTTGTGATACAGAAGGTCCTGTCGGAGTTC-TCGACAAGCTGGTGGATGGAGAGGGTGGCGTTGTAGGGCTCGACAACG  
 15 BhEt\_4 90.9% 24.9% GTTGTGATACAGAAGGTCCTGTCGGAGTTC-TCGACAAGCTGGTGGATGGAGAGGGTGGCGTTGTAGGGCTCGACAACG  
 16 KhEt\_2 80.3% 24.2% GTTGTGATACAGAAGGTCCTGTCGGAGTTC-TCGACAAGCTGGTGGATGGAGAGGGTGGCGTTGTATGGCTCTTCGACG  
 17 KaEt\_1 61.0% 24.9% GTTGTGATACAGAAGGTCCTGTCGGAGTTC-TCGACAAGCTGGTGGATGGAGAGGGTGGCGTTGTATGGCTCGATAACG  
 18 KhEt\_5 81.4% 25.4% GTTGTGATACAGAAGGTCCTGTCGGAGTTC-TCGACAAGCTGGTGGATGGAGAGAGTGGCGTTGTAGGGCTCGACAACG  
 19 KhEt\_3 81.1% 24.6% GTTGTGATACAGAAGGTCCTGTCGGAGTTC-TCGACAAGCTGGTGGATGGAGAGGGTGGCGTTGTAGGGCTCGACAACG  
 20 KhEt\_4 82.5% 25.1% GTTGTGATACAGAAGGTCCTGTCGGAGTTC-TCGACAAGCTGGTGGATGGAGAGGGTGGCGTTGTAGGGCTCGACAACG  
 21 KaEt\_3 68.2% 24.9% GTTGTGATACAGAAGGTCCTGTCGGAGTTC-TCGACAAGCTGGTGGATGGAGAGGGTGGCGTTGTAGGGCTCGACAACG  
 22 BhEt\_9 57.5% 24.6% GTTGTGATACAGAAGGTCCTGTCGGAGTTC-TCGACAAGCTGGTGGATGGAGAGGGTGGCGTTGTATG-----  
 23 BhEt\_8 59.9% 25.3% GTTGTGATACAGAAGGTCCTGTCGGAGTTC-TCGACAAGCTGGTGGATGGAGAGGGTGGCGTTGTATG-----  
 24 KaEt\_6 82.7% 23.9% GTTATCGATACAGAAAGTCTCGTCCGAGTTC-TCGACCAGCTGGTGGACGGAAAGAGTAGCGTTGTAGGGCTCAACAACG  
 25 SaEt\_5 91.0% 23.4% GTTATCGATACAGAAAGTCTCGTCCGAGTTC-TCGACCAGCTGGTGGACGGAAAGAGTAGCGTTGTAGGGCTCAACAACG  
 26 KaEt\_7 82.2% 24.1% GTTATCGATACAGAAAGTCTCGTCCGAGTTC-TCGACCAGCTGGTGGACGGAAAGAGTAGCGTTGTAGGGCTCAACAACG  
 27 KaEt\_4 82.4% 24.1% GTTATCGATACAGAAAGTCTCGTCCGAGTTC-TCGACCAGCTGGTGGACGGAAAGAGTAGCGTTGTAGGGCTCAACAACG  
 28 KaEt\_9 77.2% 24.2% GTTATCGATACAGAAAGTCTCGTCCGAGTTC-TCGACCAGCTGGTGGACGGAAAGAGTAGCGTTGTAGGGCTCAACAACG  
 29 KaEt\_8 81.9% 24.1% GTTATCGATACAGAAAGTCTCGTCCGAGTTC-TCGACCAGCTGGTGGACGGAAAGAGTAGCGTTGTAGGGCTCAACAACG  
 30 BeEt\_7 81.8% 23.9% GTTATCGATACAGAAAGTCTCGTCCGAGTTC-TCGACCAGCTGGTGGACGGAAAGAGTAGCGTTGTAGGGCTCAACAACG  
 31 BeEt\_3 82.1% 23.7% GTTATCGATACAGAAAGTCTCGTCCGAGTTC-TCGACCAGCTGGTGGACGGAAAGAGTAGCGTTGTAGGGCTCAACAACG  
 32 KhEt\_8 82.2% 23.8% GTTATCGATACAGAAAGTCTCGTCCGAGTTC-TCGACCAGCTGGTGGACGGAAAGAGTAGCGTTGTAGGGCTCAACAACG  
 33 KhEt\_7 78.5% 23.9% GTTATCGATACAGAAAGTCTCGTCCGAGTTC-TCGACCAGCTGGTGGACGGAAAGAGTAGCGTTGTAGGGCTCAACAACG  
 34 BhEt\_2 61.8% 22.7% GTTGTCTATGCAGAAAGTCTCGTCCGAGTTC-TCGACCAGCTGGTGGATGGAGAGTGTGGCGTTGTAGGGCTCGACAACG  
 35 BhEt\_1 52.4% 18.6% GTTGTCTATGCAGAAAGTCTCGTCCGAGTTC-TCGACCAGCTGGTGGATGGAGAGTGTGGCGTTGTAGGGCTCGACAACG  
 36 BeEt\_4 83.5% 26.0% GTTGTCTATGCAGAAAGTCTCGTCCGAGTTC-TCGACCAGCTGGTGGATGGAGAGTGTGGCGTTGTAGGGCTCGACAACG  
 37 SaEt\_3 81.9% 25.0% GTTGTCTATGCAGAAAGTCTCGTCCGAGTTC-TCGACCAGCTGGTGGATGGAGAGTGTGGCGTTGTAGGGCTCGATTACG  
 38 KhEt\_9 82.7% 25.2% GTTGTCTATGCAGAAAGTCTCGTCCGAGTTC-TCGACCAGCTGGTGGATGGAGAGTGTGGCGTTGTAGGGCTCGACAACG  
 39 SaEt\_4 82.7% 25.9% GTTGTCTATGCAGAAAGTCTCGTCCGAGTTC-TCGACCAGCTGGTGGATGGAGAGTGTGGCGTTGTAGGGCTCGACAACG  
 40 SaEt\_8 91.0% 25.3% GTTGTCTATGCAGAAAGTCTCGTCCGAGTTC-TCGACCAGCTGGTGGATGGAGAGTGTGGCGTTGTAGGGCTCGACAACG  
 41 KaEt\_5 91.7% 25.0% GTTGTCTATGCAGAAAGTCTCGTCCGAGTTC-TCGACCAGCTGGTGGATGGAGAGTGTGGCGTTGTAGGGCTCGACAACG  
 42 KaEt\_2 82.2% 25.9% GTTGTCTATGCAGAAAGTCTCGTCCGAGTTC-TCGACCAGCTGGTGGATGGAGAGTGTGGCGTTGTAGGGCTCGACAACG  
 43 KhEt\_6 82.5% 25.9% GTTGTCTATGCAGAAAGTCTCGTCCGAGTTC-TCGACCAGCTGGTGGATGGAGAGTGTGGCGTTGTAGGGCTCGACAACG  
 44 SaEt\_2 70.8% 26.0% GTTGTCTATGCAGAAAGTCTCGTCCGAGTTC-TCGACCAGCTGGTGGATGGAGAGTGTGGCGTTGTAGGGCTCGACAACG  
 45 SaEt\_1 82.4% 25.9% GTTGTCTATGCAGAAAGTCTCGTCCGAGTTC-TCGACCAGCTGGTGGATGGAGAGTGTGGCGTTGTAGGGCTCGACAACG  
 consensus/100% SS...SSTSS.SAASSSCTCSTSSGuss...SSSSCSSSSSS...SSSSSSSSSSSSSSSSTSTSSS.....  
 consensus/90% GTTuTCuATuCAGAAuGTCCTGTCsGAGT.s.TCuAcSAsCTsGtuuuAsuGausGsGtSGSGTtGtSSGSstSuSSSSCs  
 consensus/80% GTTuTCuATuCAGAAuGTCCTGTCuGAGT.s.TCuAcSAGCTGGTGuAsGGuAGsGtuGCGTtGtAuGGCTCuACAACG  
 consensus/70% GTTuTCuATuCAGAAuGTCCTGTCuGAGT.T.CuAcSAGCTGGTGGAsGGuAGsGtuGCGTtGtAuGGCTCuACAACG

cov pid 801  
 1 BhEt\_3 100.0% 100.0% GCCT-----GCGTTTCCCCGGTCAGTTGAACCTTGACCTGAGGGAAGT  
 2 BeEt\_2 60.7% 19.0% GTGGCATATACCTGTGTGGGATGTATCTACTAGATT--  
 3 BeEt\_1 60.7% 19.7% GTGGCATATACCTGTGTGGGATGTATCTACTAGATT--  
 4 KhEt\_1 82.5% 23.5% GTGTCCGAGACCTTAGGAGAAAGGAGGACGAAAGTAGCCA-----TCATACG--TCGGGGAACCTCCTACGGATCTTG  
 5 BeEt\_9 94.5% 24.6% GTGTCCGAAACCTTTGGGGGGAG--GGGACAAACGGAGAAGGTAGCCATCATGCGGTTCGGGGGAACCTCCTACGAAATCTT  
 6 SaEt\_7 95.0% 23.9% GTGTCCGAAACCTTTGGGGGGAG--GGGACAAACGGAGAAGGTAGCCATCATGCGGTTCGGGGA-ACCTCCTACGAAATCTTG  
 7 SaEt\_6 92.6% 24.3% GTGTCCGAAACCTTTGGGGGGAG--GGGACAAACGGAGAAGGTAGCCATCATGCGGTTCGGGGA-ACCTCCTACGAAATCTTG  
 8 SaEt\_9 93.9% 23.7% GTGTCCGAAACCTTTGGGGGGAG--GGGACAAACGGAGAAGGTAGCCATCATGCGGTTCGGGGGAACCTCCTACGAAATCTTG  
 9 BeEt\_8 93.2% 22.9% GTGTCCGAAACCTTTGGGGGGAG--GGGACAAACGGAGAAGGTAGCCATCATGCGGTTCGGGGGAACCTCCTACGAAATCTT--  
 10 BeEt\_6 82.5% 22.4% GTGTCCGAAACCTTTGGGGGGAG--GGGACAAACGGAGAAGGTAGCCATCATGCGGTTCGGGGGAACCTCCTACGAAATCTT--  
 11 BeEt\_5 92.9% 24.2% GTGTCCGAAACCTTTGGGGGGAG--GGGACAAACGGAGAAGGTAGCCATCATGCGGTTCGGGGGAACCTCCTACGAAATCTT--  
 12 BhEt\_7 82.5% 24.1% GTGTCCGAGACCTTTGGGGGAGGGCACAACGGAGAAGGTGG--CCAT-CATGCGG-TCGGGGAACCTCCTCGCGATCTTG  
 13 BhEt\_6 84.6% 23.2% GTGTCCGAGACCTTTGGGGGAGGGCACAACGGAGAAGGTGG--CCAT-CATGCGG-TCGGGGAACCTCCTCGCGATCTTG  
 14 BhEt\_5 88.4% 24.2% GTGTCCGAGACCTTTGGGGGAGGGCACAACGGAGAAGGTGG--CCAT-CATGCGG-TCGGGGAACCTCCTCGCGATCTTG  
 15 BhEt\_4 90.9% 24.9% GTTTCGGAGATCTTTGGTGGAGGGGTTT

GTGTCGGAGACCTTAGGAGAA---GGGACGACGGAGAAGGTAGCCATCATACGGTCGGG-GAACTCCTCACGGATCTTGG  
GTGTCGGAGACCTTAGGAGAA---GGGACGACGGAGAAGGTAGCCATCATACGGTCGGG-GAACTCCTCACGGATCTTGG  
GTGTCGGAGACCTTAGGAGAA---GGGACGACGGAGAAGGTAGCCATCATACGGTCGGG-GAACTCCTCACGGATCTTGG  
GTGTCGGAGACCTTAGGAGAA---GGGACGACGGAGAAGGTAGCCATCATACGGTCGGG-GAACTCCTCACGGATCTTGG  
GTGTCGGAGACCTTAGGAGAA---GGGACGACGGAGAAGGTAGCCATCATACGGTCGGG-GAACTCCTCACGGATCTTGG  
CCCTCTTTTTTATTATGCTTCACTTCTCTCCCTTTCTCTGCTC-----  
CCCTCTTTTTTATTATGCTTCACTTCTCTCCCTTTCTCTGCTC-----  
GTGTCAGATATCTTGGGGAA---GGCAGCAGCCGCTACGTGCCGTATGCGATCTGGTA-ACTCTCTCGGATCTGGG  
GTGTCGTAGACCTTGGGCAG---GGCAGCAGCGAGTAGGTGGCCATCATACGGTCGGGGAACTCCTCACGGATCTTG  
GTGTCGGAGACCTTGGGAGAG---GGCAGCAGCGAGTAGTGGCCATCATACGGTCGGGGTACTCCTCACTGATCTTGG  
GTGTCGGAGACCTTGGGGGAA---GGCAGCAGCGAGTAGGTGGCCATCATGCGGTCGGGGAATCC--TCACGGATCTGG  
GTGTCGGAGACCTTGGGGCGA---GGGCAGCAGCGAGTAGGTGCCATCATGCGGTCGGGGAACTCCTCACGGATCTTGG  
GTGTCGGAGACCTTGGG-CGA---GGGCAGCAGCGAGTAGGTGGCCATCATGCGGTCG-GGGAACCTCCTCACGGATCTTGG  
GTGTCGGAGACCTTGGG-CGA---GGGCACAACGGAGTAGTGGCCATCATGCGGTCG-GGGAACCTCCTCACGGATCTTGG  
GTGTCGGAGACCTTGGG-CGA---GGGCACAACGGAGTAGTGGCCATCATGCGGTCG-GGGAACCTCCTCACGGATCTTGG  
GTGTCGGAGACCTTGGG-CGA---GGGCACAACGGAGTAGTGGCCATCATGCGGTCG-GGGAACCTCCTCACGGATCTTGG  
GTGTCGGAGACCTTGGG-CGA---GGGCACAACGGAGTAGTGGCCATCATGCGGTCG-GGGAACCTCCTCACGGATCTTGG  
GTGTCGGAGACCTTGGG-CGA---GGGCACAACGGAGTAGTGGCCATCATGCGGTCG-GGGAACCTCCTCACGGATCTTGG

GSSSCSSSSS.TSSUS.SSS...SSSSSSSSSSS.....  
GTGTCGGAaACCTTUGGsuuu...uSSsCuusssssssG.s.C.s.CuTuCGu.ss.G.u.sssCSSSSSSUUSSS..  
GTGTCGGAuACCTTUGGuuu...uSSACuusGuAGSSsG.s.CsSTCATuCGGTCSsG.uuACTCCTCuCGuAsssTss

[illegible]

UUU.SS..USSSS..SSSSSSSSSSSSS.....SSSSS.S.SSSSSUSSS..S.SSSSSS...S....S  
uuA.SS..uuSAu.TSCCCTSCCGSS.....SSSCSSC.CCCAuuuuu.SG.GUSSS...u.ASS.SS

[illegible]



|                |        |       |       |                                                                                 |
|----------------|--------|-------|-------|---------------------------------------------------------------------------------|
| 5              | BeEt_9 | 94.5% | 24.6% | TGGGAGGCA-GTT---CGCAAGCCT-TCAGCT-----CTTCGGCGGCGGAC---CGACGTCAAGAA-CCGTTTGGTCCG |
| 6              | SaEt_7 | 95.0% | 23.9% | TGGGAGGGCAGGT---CGTAGCCCCCTCAGT-----CCTTCGGCGGGGACGAACGATCAAAGGAAGCGGATTGGTCGA  |
| 7              | SaEt_6 | 92.6% | 24.3% | TGGGAGGGCAGGT---CGTAGCCCCCTCAGT-----CCTTCGGCGGGGACGAACGATCAAAGGAAGCGGATTGGTCGA  |
| 8              | SaEt_9 | 93.9% | 23.7% | TGGAAGGCAGT-----CGCAGCCCATCAGC-----CTTCGGCGGCGGACGGACGATCA-AGGAA-ACGATTGGTCGA   |
| 9              | BeEt_8 | 93.2% | 22.9% | AGGCAGGTCTGG-----C--AGCCCCCTCAGC---CTC-G-CGGCCGGA-CGACGATCAAAGGAAACGGTTTGGTCGA  |
| 10             | BeEt_6 | 82.5% | 22.4% | GGAGGCAGTCTG-----C--AGCCCCCTCAGC---CTC-G-GCGGCGG-----                           |
| 11             | BeEt_5 | 92.9% | 24.2% | GGAGGCAGTCTG-----C--AGCCCCCTCAGC---CTC-G-GCGGCGGAACGACGATCCAAGAAACCGGTTGGCGGAC  |
| 12             | BhEt_7 | 82.5% | 24.1% | TGGAGGCAG---T---CGCAGCCCTCGGCCTC-----A-CGG-----CGGACGACGTCTGAGGAC---CTGGTCGA    |
| 13             | BhEt_6 | 84.6% | 23.2% | TGGAGGCAG---T---CGCAGCCCTCGGCCTC-----A-CGG-----CGGACGACGTCTGAGGAC---CTGGTCGA    |
| 14             | BhEt_5 | 88.4% | 24.2% | TGGAGGCAG---T---CGCAGCCCTCGGCCTC-----A-CGG-----CGGACGACGTCTGAGGAC---CTGGTCGA    |
| 15             | BhEt_4 | 90.9% | 24.9% | TGGAGGCAG---T---CGCAGCCCTCGGCCTC-----A-CGG-----CGGACGACGTCTGAGGAC---CTGGTCGA    |
| 16             | KhEt_2 | 80.3% | 24.2% | GATAGGTTT---T---CGTGATTG-----                                                   |
| 17             | KaEt_1 | 61.0% | 24.9% | -----                                                                           |
| 18             | KhEt_5 | 81.4% | 25.4% | TGGAGGCAG---T---CGCAGCCCTCGGCCTC-----A-CGG-----CG-----                          |
| 19             | KhEt_3 | 81.1% | 24.6% | TGTAGGAGG---T---TCCATCCCTTGGCCT-----                                            |
| 20             | KhEt_4 | 82.5% | 25.1% | -GGAGGCAG---T---CGCAGCCCTCGGCCTC-----A-CGG-----CGGACGA-----                     |
| 21             | KaEt_3 | 68.2% | 24.9% | -----                                                                           |
| 22             | BhEt_9 | 57.5% | 24.6% | -----                                                                           |
| 23             | BhEt_8 | 59.9% | 25.3% | -----                                                                           |
| 24             | KaEt_6 | 82.7% | 23.9% | TGGTGCTTC---G---CAACCCCTCGGCC---T-----C-GCGG-----CGGACGACATC-----               |
| 25             | SaEt_5 | 91.0% | 23.4% | TGGAGGCAG---T---CGCAACCCCTCGGCCTC-----C-GCGG-----CGGACGACATCGAGGAC---GTTGTCTGA  |
| 26             | KaEt_7 | 82.2% | 24.1% | TGGAGGCAG---T---CGCAACCCCTCGGCCTC-----G-CGGC-----GGAC-----                      |
| 27             | KaEt_4 | 82.4% | 24.1% | TGGAGGCAG---T---CGCAACCCCTCGGCCTC-----G-CGGC-----GGACG-----                     |
| 28             | KaEt_9 | 77.2% | 24.2% | TGG-----                                                                        |
| 29             | KaEt_8 | 81.9% | 24.1% | TGGAGGCAG---T---CGCAACCCCTCGGCCTC-----G-CGGC-----GG-----                        |
| 30             | BeEt_7 | 81.8% | 23.9% | TGGAGGCAG---T---CGCAACCCCTCGGCCTC-----G-CGGC-----G-----                         |
| 31             | BeEt_3 | 82.1% | 23.7% | TGGAGCAGT-----CGCAACCCCTCGGCCTC-----G-CGGC-----GGAC-----                        |
| 32             | KhEt_8 | 82.2% | 23.8% | TGGAGCAGT-----CGCAACCCCTCGGCCTC-----G-CGGC-----GGACG-----                       |
| 33             | KhEt_7 | 78.5% | 23.9% | TGGAGCAGT-----CG-----                                                           |
| 34             | BhEt_2 | 61.8% | 22.7% | -----                                                                           |
| 35             | BhEt_1 | 52.4% | 18.6% | -----                                                                           |
| 36             | BeEt_4 | 83.5% | 26.0% | TGGATTCTGT---T---CGGGTCCCTCGGCCTG-----GCGGCG-----G--AGGACATCAA-----             |
| 37             | SaEt_3 | 81.9% | 25.0% | TGGATGCTG---T---CGCATCCCTCGGCCTC-----G-----                                     |
| 38             | KhEt_9 | 82.7% | 25.2% | TGGAGGCAG---T---CGCAGCCTTGGGCCT-----CACGAC-----GGA-----                         |
| 39             | SaEt_4 | 82.7% | 25.9% | TGGAGGCAG---T---CGCAGCCTTGGGCCT-----GCGGCG-----CACGACAT-----                    |
| 40             | SaEt_8 | 91.0% | 25.3% | TGGAGGCAG---T---CGCAGCCTTGGGCCT-----GCGACG-----CACACGTCAAGGACC---TGGTCGA        |
| 41             | KaEt_5 | 91.7% | 25.0% | TGGAGGCAG---T---CGCAGCCTTGGGCCT-----TCGCGA-----CGCACACGTCAATGGAC---CCTGGTCGA    |
| 42             | KaEt_2 | 82.2% | 25.9% | TGGAGGCAG---T---CGCAGCCTTGGGCCT-----GCGACG-----GACG-----                        |
| 43             | KhEt_6 | 82.5% | 25.9% | TGGAGGCAG---T---CGCAGCCTTGGGCCT-----GCGACG-----GACGA-----                       |
| 44             | SaEt_2 | 70.8% | 26.0% | -----                                                                           |
| 45             | SaEt_1 | 82.4% | 25.9% | TGGAGGCAG---T---CGCAGCCTTGGGCCT-----GCGACG-----GACG-----                        |
| consensus/100% |        |       |       | .....                                                                           |
| consensus/90%  |        |       |       | .....                                                                           |
| consensus/80%  |        |       |       | .SS.....                                                                        |
| consensus/70%  |        |       |       | SGGusssss.....S..SSSSSSSSSS.....S.....                                          |

|    | cov    | pid    | 1041   | :                                                                           | . | . | . | 1 | . | ] 1114 |
|----|--------|--------|--------|-----------------------------------------------------------------------------|---|---|---|---|---|--------|
| 1  | BhEt_3 | 100.0% | 100.0% | TCCGACT-TCCGCAACG---GTCGTTACCTGACCTGCTCTGCG-----                            |   |   |   |   |   |        |
| 2  | BeEt_2 | 60.7%  | 19.0%  | -----                                                                       |   |   |   |   |   |        |
| 3  | BeEt_1 | 60.7%  | 19.7%  | -----                                                                       |   |   |   |   |   |        |
| 4  | KhEt_1 | 82.5%  | 23.5%  | -----                                                                       |   |   |   |   |   |        |
| 5  | BeEt_9 | 94.5%  | 24.6%  | AACAAGCTTCAGGCACCCCTCCAGATGTTAGTTGACCCCTTGGTCTCCAGGTCTGGGTTTTAACACGAGAGAGCT |   |   |   |   |   |        |
| 6  | SaEt_7 | 95.0%  | 23.9%  | CCAG-CATCAAGCCACCCATCAGCTGGTAGGTGCAACTGCCTTGGCGCTCCGA-GGCTGTGTTTACGTCAG---  |   |   |   |   |   |        |
| 7  | SaEt_6 | 92.6%  | 24.3%  | CCAG-CATCAAGCCACCCATCAGCTGGTAG-----                                         |   |   |   |   |   |        |
| 8  | SaEt_9 | 93.9%  | 23.7%  | CCAAGCATCCAGCCA-CCATCAAGTTGTAGTTGACCGCTTGGCTAGTTGATGAGCCTGGATGTCT---G---    |   |   |   |   |   |        |
| 9  | BeEt_8 | 93.2%  | 22.9%  | CAAGGCATCAGCAACTATCCAGCTGTAGTTGACTCCTTGGTCAGCTGTGTGATA-----                 |   |   |   |   |   |        |
| 10 | BeEt_6 | 82.5%  | 22.4%  | -----                                                                       |   |   |   |   |   |        |
| 11 | BeEt_5 | 92.9%  | 24.2%  | CAAGGCTTCAAGCAACCCGTCAGCGGTAAAGTACCCGTTGG-----                              |   |   |   |   |   |        |
| 12 | BhEt_7 | 82.5%  | 24.1%  | CCAGCTC---GGCACCT---CAGTGTAGTTGACTCGTTGGCCAGTTT-GT--TTACCGGGA-----          |   |   |   |   |   |        |
| 13 | BhEt_6 | 84.6%  | 23.2%  | CCAGCTC---GGCACCT---CAGTGTAGTTGACTCGTTGGCCAGTTT-GT--TTACCGGGA-----          |   |   |   |   |   |        |
| 14 | BhEt_5 | 88.4%  | 24.2%  | CCAGCTC---GGCACCT---CAGTGTAGTTGACTCGTTGGCCAGTTT-GT--TTACCGGGA-----          |   |   |   |   |   |        |
| 15 | BhEt_4 | 90.9%  | 24.9%  | CCAGCTC---GGCACCT---CAGTGTAGTTGACTCGTTGGCCAGTTT-GT--TTACCGGGA-----          |   |   |   |   |   |        |
| 16 | KhEt_2 | 80.3%  | 24.2%  | -----                                                                       |   |   |   |   |   |        |
| 17 | KaEt_1 | 61.0%  | 24.9%  | -----                                                                       |   |   |   |   |   |        |
| 18 | KhEt_5 | 81.4%  | 25.4%  | -----                                                                       |   |   |   |   |   |        |
| 19 | KhEt_3 | 81.1%  | 24.6%  | -----                                                                       |   |   |   |   |   |        |
| 20 | KhEt_4 | 82.5%  | 25.1%  | -----                                                                       |   |   |   |   |   |        |
| 21 | KaEt_3 | 68.2%  | 24.9%  | -----                                                                       |   |   |   |   |   |        |
| 22 | BhEt_9 | 57.5%  | 24.6%  | -----                                                                       |   |   |   |   |   |        |
| 23 | BhEt_8 | 59.9%  | 25.3%  | -----                                                                       |   |   |   |   |   |        |
| 24 | KaEt_6 | 82.7%  | 23.9%  | -----                                                                       |   |   |   |   |   |        |
| 25 | SaEt_5 | 91.0%  | 23.4%  | CAAGCTC---AGCTCCTT---CAGTGTAAAGACCTT-TGGGCCAGTTT-GT--TACCGAA-----           |   |   |   |   |   |        |
| 26 | KaEt_7 | 82.2%  | 24.1%  | -----                                                                       |   |   |   |   |   |        |
| 27 | KaEt_4 | 82.4%  | 24.1%  | -----                                                                       |   |   |   |   |   |        |
| 28 | KaEt_9 | 77.2%  | 24.2%  | -----                                                                       |   |   |   |   |   |        |
| 29 | KaEt_8 | 81.9%  | 24.1%  | -----                                                                       |   |   |   |   |   |        |
| 30 | BeEt_7 | 81.8%  | 23.9%  | -----                                                                       |   |   |   |   |   |        |
| 31 | BeEt_3 | 82.1%  | 23.7%  | -----                                                                       |   |   |   |   |   |        |

|    |                |       |       |                                                                           |
|----|----------------|-------|-------|---------------------------------------------------------------------------|
| 32 | KhEt_8         | 82.2% | 23.8% | -----                                                                     |
| 33 | KhEt_7         | 78.5% | 23.9% | -----                                                                     |
| 34 | BhEt_2         | 61.8% | 22.7% | -----                                                                     |
| 35 | BhEt_1         | 52.4% | 18.6% | -----                                                                     |
| 36 | BeEt_4         | 83.5% | 26.0% | -----                                                                     |
| 37 | SaEt_3         | 81.9% | 25.0% | -----                                                                     |
| 38 | KhEt_9         | 82.7% | 25.2% | -----                                                                     |
| 39 | SaEt_4         | 82.7% | 25.9% | -----                                                                     |
| 40 | SaEt_8         | 91.0% | 25.3% | CGAGCTC---GGCACCT--CAGTGTAGTG-ACCCCTTGGATCAGTT-TG--TGGTTATCACCGAGAAGGA-   |
| 41 | KaEt_5         | 91.7% | 25.0% | CGAGCAT---CGGCACCCCTTCAGTTGTAGTTGACCCCTTGGGCCCAGA-TT--TGTTTTACCAGGAA----- |
| 42 | KaEt_2         | 82.2% | 25.9% | -----                                                                     |
| 43 | KhEt_6         | 82.5% | 25.9% | -----                                                                     |
| 44 | SaEt_2         | 70.8% | 26.0% | -----                                                                     |
| 45 | SaEt_1         | 82.4% | 25.9% | -----                                                                     |
|    | consensus/100% |       |       | .....                                                                     |
|    | consensus/90%  |       |       | .....                                                                     |
|    | consensus/80%  |       |       | .....                                                                     |
|    | consensus/70%  |       |       | .....                                                                     |
